# Supplementary material for: Influence of seating styles on head and pelvic vertical movement symmetry in horses ridden at trot
Source: PLoS One. 2018 Apr 5;13(4):e0195341. doi: 10.1371/journal.pone.0195341 (PMC5886531; doi:10.1371/journal.pone.0195341)
Supplement: S4 File — Excel book containing sheets with the data sets used for the five different mixed model analyses preformed. Sheet ‘Abbreviations’ contains explanations of the variable names. Sheet ‘All_horses’, contains the data for the analysis including all horses. Sheet ‘HDmin_asymmetric’, ‘HDmax_asymmetric’, ‘PDmin_asymmetric’ and ‘PDmax_asymmetric’ contains the data from the asymmetric subsets selected for asymmetry of the respective symmetry variables. (XLSX) [file pone.0195341.s004.xlsx]

## Sheet: Abbreviations
Variable	Explanation		Condition	Explanation	Comments
Horse	Horse		rCrS	‘ridden circle right, sitting'	For more precise definitions of seat, se article.
Condition	Different combinations of seating styles and straight/circular tracks, see right for futher details.		rCrH	‘ridden circle right, two point'
Condition1	A combination of left and right circles/rising diagonals resulting in a total of 9 trial conditions (from 15)		rCrRL	‘ridden circle right, rising trot, sitting on correct diagonal (LF/RH)'
Condition3	Trial condition (n=15) relabeled to describe the position of the limb to which the asymmetry was attributed		rCrRR	‘ridden circle right, rising trot, sitting on incorrect diagonal (RF/LH)'
Fore_Diff_Min_Mean1	HDmin (mean)		rClS	‘ridden circle left, sitting'
Fore_Diff_Min_Mean2	HDmin, right rising on the straight/left circle measurements multiplied by -1		rClH	‘ridden circle left, two point’
Fore_Diff_Min_Mean3	HDmin, multiplied by -1 for the horses with negative asymmetry values during ‘unridden straight’		rClRR	‘ridden circle left, rising trot, sitting on correct diagonal (RF/LH)'
Fore_Diff_Min_Mean33	Fore_Diff_Min_Mean3 +29		rClRL	‘ridden circle left, rising trot, sitting on incorrect diagonal (LF/RH)'
sqFore_Diff_Min_Mean33	Fore_Diff_Min_Mean33*Fore_Diff_Min_Mean33		rSS	‘ridden straight, sitting'
Fore_Diff_Min_SD	Standard deviation of HDmin (mean)		rSH	‘ridden straight, two point
Fore_Diff_Max_Mean1	HDmax (mean)		rSRR	‘ridden straight, rising trot, rider sitting during RF/LH diagonal stance'
Fore_Diff_Max_Mean2	HDmax, right rising on the straight/left circle measurements multiplied by -1		rSRL	‘ridden straight, rising trot, rider sitting during LF/RH diagonal stance'
Fore_Diff_Max_Mean3	HDmax, multiplied by -1 for the horses with negative asymmetry values during ‘unridden straight’
Fore_Diff_Max_SD	Standard deviation of HDmax (mean)		uCr	‘unridden circle right'
Hind_Diff_Min_Mean1	PDmin (mean)		uCl	‘unridden circle left'
Hind_Diff_Min_Mean2	PDmin, right rising on the straight/left circle measurements multiplied by -1		uS	‘unridden straight'
Hind_Diff_Min_Mean3	PDmin, multiplied by -1 for the horses with negative asymmetry values during ‘unridden straight’
Hind_Diff_Min_SD	Standard deviation of PDmin (mean)
Hind_Diff_Max_Mean1	PDmax (mean)
Hind_Diff_Max_Mean2	PDmax, right rising on the straight/left circle measurements multiplied by -1
Hind_Diff_Max_Mean3	PDmax, multiplied by -1 for the horses with negative asymmetry values during ‘unridden straight’
Hind_Diff_Max_SD	Standard deviation of PDmax (mean)
Lead	The lead (left/right/straight)
Horselead	The lead (left/right/straight) within each horse

## Sheet: All_horses
Obs	Horse	Condition	Condition1	Fore_Diff_Min_Mean2	Fore_Diff_Min_Mean1	Fore_Diff_Min_SD	Fore_Diff_Max_Mean2	Fore_Diff_Max_Mean1	Fore_Diff_Max_SD	Hind_Diff_Min_Mean2	Hind_Diff_Min_Mean1	Hind_Diff_Min_SD	Hind_Diff_Max_Mean2	Hind_Diff_Max_Mean1	Hind_Diff_Max_SD	Lead	Horselead
1	Horse1	rSS	Sitting	-1.4878	-1.4878	9.23411306570739968	-2.6729	-2.6729	8.90087644845032064	-0.1977	-0.1977	4.69359249665228992	1.6497	1.6497	2.99099585321683008	nolead	Arwen_nolead
2	Horse1	rSRL	Rising	-10.7110	10.7110	12.9347330890756992	-1.2497	1.2497	12.8679854576144	2.8010	-2.8010	3.61680924903041984	-9.9614	9.9614	3.13620207523651008	nolead	Arwen_nolead
3	Horse1	rSH	Hunt	6.2079	6.2079	10.780958184411	-7.3280	-7.3280	11.5961625615312992	2.0047	2.0047	3.5525658931125504	1.3460	1.3460	3.38467498785678016	nolead	Arwen_nolead
4	Horse1	rCrH	HuntC	6.8186	6.8186	8.16086629497033984	-13.2872	-13.2872	8.46160896416692096	3.1918	3.1918	2.56467494971662016	-2.6764	-2.6764	3.15687837024217984	right	Arwen_right
5	Horse1	rCrRL	Correct_Diagonal	17.9815	17.9815	14.4286705378161984	-2.5031	-2.5031	15.3342180978516992	-1.1432	-1.1432	2.29624140682510016	6.1974	6.1974	2.90962869842643008	right	Arwen_right
6	Horse1	rCrRR	Wrong_Diagonal	21.6948	21.6948	11.3258552945716	-17.5339	-17.5339	14.6203774058055008	6.6721	6.6721	2.59750868563512992	-7.3991	-7.3991	3.93175719671987008	right	Arwen_right
7	Horse1	rCrS	SittingC	12.4733	12.4733	12.928222742285	-3.2367	-3.2367	13.6489112288394016	2.9034	2.9034	3.26476051152708032	-0.8747	-0.8747	4.21677331946478976	right	Arwen_right
8	Horse1	rClRR	Correct_Diagonal	0.7150	-0.7150	12.2437517279696992	-2.5666	2.5666	14.1844453213509984	1.4536	-1.4536	2.86762937263155968	4.0004	-4.0004	4.43446368934619968	left	Arwen_left
9	Horse1	rClRL	Wrong_Diagonal	1.4174	-1.4174	11.8496870244453984	-8.1943	8.1943	11.2078555246818992	7.3540	-7.3540	2.80611411659668992	-12.6379	12.6379	3.57521092945617024	left	Arwen_left
10	Horse1	rClH	HuntC	-2.0931	2.0931	9.7221261628546496	3.5008	-3.5008	10.3243440314627008	4.9188	-4.9188	2.04159992336624992	-5.0069	5.0069	3.12249209415750976	left	Arwen_left
11	Horse1	rClS	SittingC	6.1081	-6.1081	11.3250775734149008	-5.9625	5.9625	17.8007247894918976	5.9236	-5.9236	2.85690771400100992	-2.1467	2.1467	5.2428479493695296	left	Arwen_left
12	Horse1	uCr	UnriddenC	-4.5602	-4.5602	16.1525118519073984	-2.2362	-2.2362	14.2032685980693984	3.1848	3.1848	2.46032022684152	-3.6256	-3.6256	3.12196139431395008	right	Arwen_right
13	Horse1	uCl	UnriddenC	2.4042	-2.4042	9.8048782221059392	0.9393	-0.9393	9.3377823647044096	4.0068	-4.0068	2.45721221164650016	-4.8132	4.8132	2.95773557915585024	left	Arwen_left
14	Horse1	uS	Unridden	-3.7448	-3.7448	11.614822241227	-5.7202	-5.7202	6.26556364351574016	-2.9380	-2.9380	1.86292608267356	-1.3099	-1.3099	2.51413582945844992	nolead	Arwen_nolead
15	Horse2	rClRR	Correct_Diagonal	-1.3828	1.3828	4.7492376207484896	-5.9580	5.9580	8.29264941051435904	-3.5880	3.5880	1.80199925380578016	3.1443	-3.1443	2.76885388366168992	left	Caretin_left
16	Horse2	rClRL	Wrong_Diagonal	13.9784	-13.9784	5.0328484352000096	-19.7931	19.7931	8.75780063968283904	-1.3298	1.3298	2.22809090701213024	-6.0717	6.0717	1.61999144306695008	left	Caretin_left
17	Horse2	rClS	SittingC	6.9241	-6.9241	5.53999298299788032	-12.0713	12.0713	7.4426929990139904	-2.2564	2.2564	2.14523969740589984	1.1990	-1.1990	2.59373833076582016	left	Caretin_left
18	Horse2	rClH	HuntC	11.5047	-11.5047	2.79096471996828	-6.3998	6.3998	3.88996809181678016	-1.0621	1.0621	2.61954566998849984	-4.1228	4.1228	2.24447822572816	left	Caretin_left
19	Horse2	rCrRL	Correct_Diagonal	1.5187	1.5187	3.92082642579635968	1.8569	1.8569	10.7371793892120016	-0.1793	-0.1793	2.11500870960588992	3.2365	3.2365	2.70966095132700992	right	Caretin_right
20	Horse2	rCrRR	Wrong_Diagonal	6.9831	6.9831	4.88306043379946944	1.8867	1.8867	8.62290016201228928	3.3957	3.3957	1.69891600091083008	-6.2055	-6.2055	2.01721245254642016	right	Caretin_right
21	Horse2	rCrS	SittingC	2.7124	2.7124	6.21391650025350016	2.1991	2.1991	10.7659702321885008	1.8286	1.8286	3.04470863570486976	-2.1744	-2.1744	3.57086181530838976	right	Caretin_right
22	Horse2	rCrH	HuntC	3.8634	3.8634	2.63916980164456	4.4894	4.4894	4.5757239212529696	3.4983	3.4983	2.08413543085277024	-2.2958	-2.2958	2.61687552589827008	right	Caretin_right
23	Horse2	rSRL	Rising	3.7069	-3.7069	3.84507965867332032	-10.9534	10.9534	8.34060924719057024	1.9212	-1.9212	2.81886190270651008	-4.4314	4.4314	2.06282758510432992	nolead	Caretin_nolead
24	Horse2	rSRR	Rising	3.6881	3.6881	3.45358428633131008	2.2116	2.2116	5.68684060497148032	1.3669	1.3669	2.49602299536892992	-2.2374	-2.2374	2.38167056220973984	nolead	Caretin_nolead
25	Horse2	rSS	Sitting	0.2013	0.2013	3.07057497092249024	4.7233	4.7233	5.89519263632779008	1.2512	1.2512	2.44566722640492	1.3107	1.3107	2.61710129435850016	nolead	Caretin_nolead
26	Horse2	rSH	Hunt	0.8615	0.8615	3.23130538774372032	4.9711	4.9711	5.03327714359510016	2.9124	2.9124	3.0811630901032	3.6872	3.6872	3.1240187555642496	nolead	Caretin_nolead
27	Horse2	uCl	UnriddenC	7.2279	-7.2279	2.60136880948943968	-2.1900	2.1900	3.3834424845741504	0.2419	-0.2419	3.01270837950790976	-2.9296	2.9296	2.66518239979964992	left	Caretin_left
28	Horse2	uCr	UnriddenC	3.5589	3.5589	3.56887262531772992	11.5910	11.5910	3.3454357218317504	0.4432	0.4432	2.06085756691497984	-1.3869	-1.3869	2.10772647568906976	right	Caretin_right
29	Horse2	uS	Unridden	1.4797	1.4797	4.4005183770531904	8.3178	8.3178	6.29439894228466048	0.2488	0.2488	2.76508461913434016	2.9349	2.9349	3.24825438781366016	nolead	Caretin_nolead
30	Horse3	uCr	UnriddenC	-0.0162	-0.0162	6.44341752672710016	-1.8946	-1.8946	6.49317558422450944	8.3030	8.3030	3.20909763530416	2.9104	2.9104	2.39632623096110016	right	Carneau_right
31	Horse3	uCl	UnriddenC	-1.6125	1.6125	3.37612996419332032	-5.5457	5.5457	5.00615400851662976	6.4547	-6.4547	3.08708928277204032	0.7611	-0.7611	3.37715233170024	left	Carneau_left
32	Horse3	uS	Unridden	3.8407	3.8407	3.83505200339905984	3.3863	3.3863	4.79794763121334976	-0.5950	-0.5950	3.91971710052674048	-1.4871	-1.4871	3.36433766221691008	nolead	Carneau_nolead
33	Horse3	rSRR	Rising	1.4883	1.4883	3.51978986244964992	2.2455	2.2455	4.26531652789296	3.0766	3.0766	1.69923622357410016	0.3133	0.3133	2.09525520559442016	nolead	Carneau_nolead
34	Horse3	rSRL	Rising	2.1939	-2.1939	4.89105226438834944	-3.5949	3.5949	3.84320396400332992	3.2579	-3.2579	2.671695051811	-2.4869	2.4869	3.00373421503705024	nolead	Carneau_nolead
35	Horse3	rSH	Hunt	1.6219	1.6219	2.55828994019136992	1.1036	1.1036	3.8989221441601696	2.7828	2.7828	2.41003495111365984	1.8223	1.8223	2.24374161562825024	nolead	Carneau_nolead
36	Horse3	rSS	Sitting	-0.6200	-0.6200	2.48121674891004	0.0191	0.0191	3.56087333508305984	2.7955	2.7955	2.66640221927106016	1.5468	1.5468	2.17502306789251008	nolead	Carneau_nolead
37	Horse3	rCrRL	Correct_Diagonal	6.1316	6.1316	4.63556544317269056	-6.7525	-6.7525	4.50860647576582976	8.8001	8.8001	2.37808751815955008	5.1064	5.1064	3.58568600862430016	right	Carneau_right
38	Horse3	rCrRR	Wrong_Diagonal	11.7426	11.7426	4.88481401074430016	-7.5633	-7.5633	3.94576119044126016	11.6329	11.6329	2.52461377193447008	1.0005	1.0005	2.43723302242218976	right	Carneau_right
39	Horse3	rCrS	SittingC	9.5577	9.5577	5.7183883455589696	-4.4804	-4.4804	4.62448397315691008	9.9447	9.9447	2.69578955750893024	2.8704	2.8704	3.30888729013688	right	Carneau_right
40	Horse3	rCrH	HuntC	6.2402	6.2402	5.43746195523260992	-8.3029	-8.3029	7.81830117284898048	9.5161	9.5161	2.85390693646144992	0.1276	0.1276	2.98318967467933952	right	Carneau_right
41	Horse3	rClRR	Correct_Diagonal	9.2174	-9.2174	5.60925783823376	-8.5146	8.5146	4.92469233177008	0.4132	-0.4132	2.42862739196832992	-0.4514	0.4514	2.83422333321172992	left	Carneau_left
42	Horse3	rClRL	Wrong_Diagonal	12.7079	-12.7079	4.96903534776845056	-8.6881	8.6881	4.13557897827139968	6.4557	-6.4557	2.09803253639607008	-3.9503	3.9503	2.78047985554182016	left	Carneau_left
43	Horse3	rClH	HuntC	5.5937	-5.5937	4.21777985862328	-7.1014	7.1014	6.28344876093355008	4.8344	-4.8344	2.93706931561750976	-3.3525	3.3525	2.7620338339634	left	Carneau_left
44	Horse3	rClS	SittingC	10.6207	-10.6207	5.32349354210145024	-8.2684	8.2684	4.38439598735681984	3.2046	-3.2046	2.90544182209305984	-3.1364	3.1364	3.53330643332550016	left	Carneau_left
45	Horse4	uS	Unridden	4.1660	4.1660	15.2705346646330016	-1.0100	-1.0100	22.1591246828853984	-0.2083	-0.2083	4.74941298296494976	2.8769	2.8769	4.04901912033369984	nolead	Chimeca_nolead
46	Horse4	uCr	UnriddenC	4.5583	4.5583	9.15595209748632064	1.9855	1.9855	6.16250145781081984	2.0069	2.0069	3.42991448166656	-2.8022	-2.8022	4.24846758823963008	right	Chimeca_right
47	Horse4	uCl	UnriddenC	2.3613	-2.3613	8.47323992308628992	8.9378	-8.9378	5.73396247943034944	5.3873	-5.3873	3.24238287555934976	-5.8460	5.8460	3.20554858887825024	left	Chimeca_left
48	Horse4	rSH	Hunt	4.3679	4.3679	6.56305558123357952	1.4753	1.4753	5.93257525279917056	-1.0892	-1.0892	3.38841767737444992	1.5019	1.5019	2.12001830917460992	nolead	Chimeca_nolead
49	Horse4	rSRR	Rising	2.6062	2.6062	8.5172550958563904	-3.8674	-3.8674	9.21285914279790976	0.9718	0.9718	3.03196332078548032	-0.7658	-0.7658	2.53089793849294016	nolead	Chimeca_nolead
50	Horse4	rSRL	Rising	-0.3721	0.3721	8.71271807456317056	-1.9485	1.9485	8.94103364338936064	2.3992	-2.3992	2.95298579579921024	-8.2282	8.2282	2.73913837391524992	nolead	Chimeca_nolead
51	Horse4	rSS	Sitting	3.0660	3.0660	6.54097334880972928	0.5167	0.5167	5.13418744043612032	-0.2270	-0.2270	2.86773535670696992	3.2636	3.2636	2.82853972656609984	nolead	Chimeca_nolead
52	Horse4	rCrH	HuntC	4.4163	4.4163	7.47479796499427968	-1.2989	-1.2989	7.12247483821361024	3.0098	3.0098	2.58774287895941024	-0.0208	-0.0208	2.82225397963708992	right	Chimeca_right
53	Horse4	rCrRL	Correct_Diagonal	9.8701	9.8701	12.0887301126576	2.5769	2.5769	10.9497667766346992	0.6929	0.6929	3.44705773070092992	4.4723	4.4723	2.47497358401643008	right	Chimeca_right
54	Horse4	rCrRR	Wrong_Diagonal	12.2649	12.2649	9.46022089284998912	-2.0676	-2.0676	9.67893212703948928	5.1951	5.1951	2.69233447238528	-4.0485	-4.0485	3.35589771883555008	right	Chimeca_right
55	Horse4	rCrS	SittingC	15.1524	15.1524	7.98266702288526976	2.4352	2.4352	10.262612434434	2.0948	2.0948	3.71512922227052992	-0.6876	-0.6876	4.64945952832060992	right	Chimeca_right
56	Horse4	rClH	HuntC	5.9357	-5.9357	7.73657472261473024	0.5220	-0.5220	7.66171923366214016	7.2376	-7.2376	3.11715114204344	-3.8679	3.8679	3.4314816623784	left	Chimeca_left
57	Horse4	rClS	SittingC	15.5471	-15.5471	6.28718161497574016	1.3623	-1.3623	8.1237297034521792	4.1853	-4.1853	2.72169747188796992	-0.5532	0.5532	3.38301464926891008	left	Chimeca_left
58	Horse4	rClRR	Correct_Diagonal	10.6859	-10.6859	8.4929943182183104	0.3358	-0.3358	9.31491154010571008	2.6053	-2.6053	2.39910984084668	3.9554	-3.9554	2.54914223790972992	left	Chimeca_left
59	Horse4	rClRL	Wrong_Diagonal	11.3849	-11.3849	6.75557722132777984	-4.8060	4.8060	8.12924638388776064	6.9018	-6.9018	2.88496072893217984	-5.7670	5.7670	3.51461030974668992	left	Chimeca_left
60	Horse5	rCrH	HuntC	2.5465	2.5465	2.51960283734916	1.5949	1.5949	4.84998123324689984	13.6778	13.6778	2.19300009308014976	-3.6526	-3.6526	1.91317672996364	right	Colette_right
61	Horse5	rCrRL	Correct_Diagonal	7.9420	7.9420	5.5126366015160896	4.1182	4.1182	13.2761407272976	11.2563	11.2563	2.23767173716504992	4.1976	4.1976	2.49317532512946016	right	Colette_right
62	Horse5	rCrRR	Wrong_Diagonal	3.6937	3.6937	6.37381077290137984	-17.3978	-17.3978	12.4501891358304	15.9153	15.9153	2.19600388704178016	-4.4271	-4.4271	2.29377692684861984	right	Colette_right
63	Horse5	rClH	HuntC	-1.0836	1.0836	3.89055541036660992	4.3333	-4.3333	5.75738336772144	4.8999	-4.8999	3.21280437801021952	-1.4799	1.4799	2.93505756390897024	left	Colette_left
64	Horse5	rClRR	Correct_Diagonal	-2.5737	2.5737	5.69825444152766016	10.0371	-10.0371	9.8279537366544704	-2.7501	2.7501	2.1615426868064	4.1661	-4.1661	2.17813468278380032	left	Colette_left
65	Horse5	rClRL	Wrong_Diagonal	2.2382	-2.2382	9.81587210797868928	1.7942	-1.7942	14.3851146623135008	3.3986	-3.3986	3.73765857708617024	-5.9352	5.9352	2.45291642521697984	left	Colette_left
66	Horse5	rSRR	Rising	5.2956	5.2956	9.27649497084093952	-6.0348	-6.0348	12.7501196924633008	8.2387	8.2387	2.35256205813335008	-4.7296	-4.7296	1.74149435983042016	nolead	Colette_nolead
67	Horse5	rSRL	Rising	-3.9951	3.9951	12.1442772125610016	-5.2455	5.2455	13.2558095552702	-2.7108	2.7108	3.26346791137852992	-1.2305	1.2305	2.03344486387824	nolead	Colette_nolead
68	Horse5	rSS	Sitting	7.4646	7.4646	6.27262791230465024	2.1081	2.1081	17.5885755333267008	4.5682	4.5682	4.66439855171522048	-2.5374	-2.5374	2.00366999384144992	nolead	Colette_nolead
69	Horse5	rSH	Hunt	1.6157	1.6157	6.7194158422951104	4.8510	4.8510	12.410749242616	4.1366	4.1366	4.22341491262130048	-2.4997	-2.4997	3.61142419438292992	nolead	Colette_nolead
70	Horse5	uCr	UnriddenC	-5.3873	-5.3873	4.00816192465283008	1.9596	1.9596	5.43911317814854976	11.2159	11.2159	2.12250772996120992	-1.7348	-1.7348	2.41606242027418976	right	Colette_right
71	Horse5	uCl	UnriddenC	-7.8031	7.8031	6.16389394757286016	-4.1664	4.1664	11.227730569166	6.4446	-6.4446	2.55727200851361984	0.1201	-0.1201	2.94534459306052032	left	Colette_left
72	Horse5	uS	Unridden	-2.6213	-2.6213	3.53723590828475008	6.2113	6.2113	6.16762309176598016	1.3046	1.3046	2.52119628153131968	-3.5638	-3.5638	2.96679217795123008	nolead	Colette_nolead
73	Horse6	uS	Unridden	-5.0222	-5.0222	1.90526110461685984	-0.9626	-0.9626	3.41737939549769984	-0.4714	-0.4714	1.48178678913605024	1.3948	1.3948	2.02247019884495008	nolead	Dexter_nolead
74	Horse6	uCl	UnriddenC	4.6479	-4.6479	2.2617911385156	2.4796	-2.4796	2.66316313871213024	-0.7771	0.7771	1.55462538839849984	-3.6718	3.6718	1.72263077056512992	left	Dexter_left
75	Horse6	uCr	UnriddenC	-3.7450	-3.7450	2.32115801913926016	-3.9556	-3.9556	3.11578636701214016	0.5123	0.5123	1.62383511319272	3.6222	3.6222	1.58547297100019008	right	Dexter_right
76	Horse6	rSH	Hunt	-2.3616	-2.3616	3.79777201142498048	-3.8940	-3.8940	2.97224369956881024	0.6028	0.6028	2.90504574737082048	0.1824	0.1824	1.90094050384283008	nolead	Dexter_nolead
77	Horse6	rSS	Sitting	-3.0815	-3.0815	5.51037508494978048	-3.7764	-3.7764	5.17163153340491008	-0.3997	-0.3997	3.15019587897670016	1.3124	1.3124	1.68163883902372992	nolead	Dexter_nolead
78	Horse6	rSRL	Rising	0.3044	-0.3044	4.15141125842209024	0.7209	-0.7209	3.12539754759344	1.4811	-1.4811	2.46600273209585984	-4.4485	4.4485	2.05412170243827008	nolead	Dexter_nolead
79	Horse6	rSRR	Rising	0.4700	0.4700	4.47606845666235008	-2.8394	-2.8394	3.66233708563556992	0.4233	0.4233	1.83326700663353984	-1.6211	-1.6211	1.77220737344725024	nolead	Dexter_nolead
80	Horse6	rClH	HuntC	10.3054	-10.3054	9.59971931853232128	-0.8086	0.8086	7.4105804236923008	-0.0352	0.0352	2.46667441613365984	-3.3380	3.3380	2.52214390708111008	left	Dexter_left
81	Horse6	rClS	SittingC	5.9616	-5.9616	5.26055292249260992	0.8292	-0.8292	4.1897659225493504	-0.8361	0.8361	1.92727777571564992	-2.0177	2.0177	1.94328207190552992	left	Dexter_left
82	Horse6	rClRR	Correct_Diagonal	2.7882	-2.7882	6.84633185044674944	3.7962	-3.7962	4.19464289680346944	-1.3426	1.3426	2.24780863475842016	1.1689	-1.1689	2.79159852118044992	left	Dexter_left
83	Horse6	rClRL	Wrong_Diagonal	7.2734	-7.2734	8.49312752175170944	-1.0214	1.0214	4.72164138254376	0.3338	-0.3338	1.93770620716522016	-4.9607	4.9607	1.51580071566928	left	Dexter_left
84	Horse6	rCrH	HuntC	-2.8016	-2.8016	4.13219825383220032	-3.3016	-3.3016	3.17881887788576	2.4509	2.4509	2.06120518157267008	1.2623	1.2623	1.64194732790693024	right	Dexter_right
85	Horse6	rCrS	SittingC	17.4006	17.4006	6.81991807326235008	-9.9358	-9.9358	3.84050796379624	1.0434	1.0434	2.06113469475592	4.4259	4.4259	2.32052969753838976	right	Dexter_right
86	Horse6	rCrRL	Correct_Diagonal	18.5470	18.5470	9.75003843465581056	-3.8618	-3.8618	5.93488344556804992	-1.4013	-1.4013	2.27705489671052032	5.9593	5.9593	2.44744177446815008	right	Dexter_right
87	Horse6	rCrRR	Wrong_Diagonal	18.1477	18.1477	7.25827330116646016	-6.2525	-6.2525	5.85532972185448064	1.7242	1.7242	2.44818969309536	-0.0225	-0.0225	6.64233178429308032	right	Dexter_right
88	Horse7	rSRR	Rising	11.3901	11.3901	6.94461058553910016	-0.0315	-0.0315	6.94912922202196992	-1.0484	-1.0484	3.05007786170931008	-8.3940	-8.3940	2.68150547414742976	nolead	Dolce_Tau_nolead
89	Horse7	rSRL	Rising	-1.7005	1.7005	8.41794607902616064	0.8852	-0.8852	8.27535026316925952	1.6364	-1.6364	3.64036919125141952	-12.4029	12.4029	3.78217509926636992	nolead	Dolce_Tau_nolead
90	Horse7	rSH	Hunt	8.6857	8.6857	2.74623600490454016	-1.1492	-1.1492	6.37682440375239936	-2.1570	-2.1570	3.89412053442369984	3.0086	3.0086	3.989311894028	nolead	Dolce_Tau_nolead
91	Horse7	rCrRL	Correct_Diagonal	2.6730	2.6730	6.50069088375575936	-0.6369	-0.6369	9.84229608508550016	2.3798	2.3798	2.85339455686492032	3.8822	3.8822	2.46063851047538016	right	Dolce_Tau_right
92	Horse7	rCrRR	Wrong_Diagonal	7.8320	7.8320	7.04906928113873024	-6.4109	-6.4109	9.56915731092320128	1.7787	1.7787	2.83227128269929024	-11.1980	-11.1980	2.06110438726520032	right	Dolce_Tau_right
93	Horse7	rCrH	HuntC	8.0883	8.0883	6.32554598004024064	0.2337	0.2337	6.26093298169179008	4.2023	4.2023	2.77015999349666016	-6.5074	-6.5074	3.22264723450035968	right	Dolce_Tau_right
94	Horse7	rCrS	SittingC	4.3248	4.3248	7.25052312878226944	-5.2657	-5.2657	8.07825861634396928	0.2940	0.2940	2.84384013420456992	-7.5115	-7.5115	3.16891225872122048	right	Dolce_Tau_right
95	Horse7	rClRR	Correct_Diagonal	-8.7955	8.7955	7.79906967241585024	11.8668	-11.8668	8.54489739746233984	10.9411	-10.9411	2.66428336947896992	3.3850	-3.3850	2.64361234283075008	left	Dolce_Tau_left
96	Horse7	rClRL	Wrong_Diagonal	1.8221	-1.8221	8.20993613739155968	5.8016	-5.8016	9.06407705433408	8.6272	-8.6272	2.31383041291576992	-11.9633	11.9633	2.55910432928861024	left	Dolce_Tau_left
97	Horse7	rClH	HuntC	-8.9827	8.9827	4.38618077892675968	7.1664	-7.1664	6.1368719126649408	10.6293	-10.6293	1.86189334996523008	-5.5337	5.5337	2.19036943526621984	left	Dolce_Tau_left
98	Horse7	rClS	SittingC	-5.9025	5.9025	8.18953409636496896	13.5809	-13.5809	5.28178349025110976	7.9228	-7.9228	2.58983534479629984	-7.8999	7.8999	3.13648452964283008	left	Dolce_Tau_left
99	Horse7	rSS	Sitting	7.4165	7.4165	6.1158728276539392	-6.9407	-6.9407	6.61300157053067008	-2.1294	-2.1294	2.69472630089951008	3.2557	3.2557	2.68816017813044992	nolead	Dolce_Tau_nolead
100	Horse7	uS	Unridden	10.2688	10.2688	3.06532607345633984	3.9676	3.9676	3.62640218472435008	-2.9552	-2.9552	2.79797014795208992	-0.3677	-0.3677	2.17825598835544992	nolead	Dolce_Tau_nolead
101	Horse7	uCr	UnriddenC	6.2723	6.2723	3.77671314601846016	4.7806	4.7806	2.91978953954774016	2.6252	2.6252	2.24986969148721984	-7.4199	-7.4199	3.21121906795630016	right	Dolce_Tau_right
102	Horse7	uCl	UnriddenC	-13.2964	13.2964	3.86291068191649984	2.5415	-2.5415	3.85240123913561024	8.5786	-8.5786	2.01119885875176032	-4.2756	4.2756	2.21160818213496	left	Dolce_Tau_left
103	Horse8	uCr	UnriddenC	4.1826	4.1826	3.04433052400865984	11.1316	11.1316	5.79028878219571968	2.0072	2.0072	2.26421206511249024	1.4891	1.4891	1.8344535779118	right	Don_Flammentanz_right
104	Horse8	uCl	UnriddenC	1.9223	-1.9223	5.03404284347456	3.2113	-3.2113	6.32205699141934976	7.5003	-7.5003	2.24816418401000992	-4.9211	4.9211	2.26094308821250016	left	Don_Flammentanz_left
105	Horse8	rSH	Hunt	1.8392	1.8392	5.01613358428790976	5.3289	5.3289	8.00304400597769088	-4.7195	-4.7195	2.19751268288570016	1.1465	1.1465	2.26996073429118016	nolead	Don_Flammentanz_nolead
106	Horse8	rSS	Sitting	1.7789	1.7789	3.20124990623033024	7.5570	7.5570	6.85680448082572928	-4.7651	-4.7651	2.27460738991437024	2.9085	2.9085	2.21550394152346976	nolead	Don_Flammentanz_nolead
107	Horse8	rSRR	Rising	4.2899	4.2899	5.01075395052152064	0.9443	0.9443	7.08004614137112064	-1.5766	-1.5766	1.50484676701623008	-0.0906	-0.0906	2.01530355887256992	nolead	Don_Flammentanz_nolead
108	Horse8	rSRL	Rising	2.2931	-2.2931	3.53299601259012992	-8.7734	8.7734	6.63144369863104	6.7977	-6.7977	1.92753994712856992	-5.9854	5.9854	1.76945018604448	nolead	Don_Flammentanz_nolead
109	Horse8	rCrS	SittingC	12.8823	12.8823	5.78387181950438016	-1.4399	-1.4399	10.3001096789080016	1.3192	1.3192	1.94756863195268	1.7919	1.7919	2.11301020931349984	right	Don_Flammentanz_right
110	Horse8	rCrH	HuntC	11.1371	11.1371	5.90775059258601984	-0.9001	-0.9001	9.33306698339795968	2.9138	2.9138	2.59152536933041024	-1.4457	-1.4457	2.12841968938671008	right	Don_Flammentanz_right
111	Horse8	rCrRL	Correct_Diagonal	9.1890	9.1890	5.03246595967011968	0.7136	0.7136	7.01888886467517056	-1.5762	-1.5762	2.16920757383065024	3.4675	3.4675	2.25915854065274016	right	Don_Flammentanz_right
112	Horse8	rCrRR	Wrong_Diagonal	14.8891	14.8891	6.56510365854460928	-5.0460	-5.0460	7.98318192966171008	2.8459	2.8459	2.28739188757010016	-3.0272	-3.0272	2.37864815805592	right	Don_Flammentanz_right
113	Horse8	rClH	HuntC	8.8551	-8.8551	5.6460702180223104	-2.3213	2.3213	12.5286868532756	5.7368	-5.7368	2.4924233024584	-4.4785	4.4785	1.96230255180227008	left	Don_Flammentanz_left
114	Horse8	rClS	SittingC	8.1299	-8.1299	5.74768073433348032	-6.3113	6.3113	10.1086878909048	5.6336	-5.6336	2.21765760361875008	-5.0920	5.0920	1.53740544241052992	left	Don_Flammentanz_left
115	Horse8	rClRR	Correct_Diagonal	4.2212	-4.2212	7.6459031615467904	-4.6559	4.6559	7.91735930123886976	3.6665	-3.6665	2.12297256441116	-1.0571	1.0571	1.62288582340715008	left	Don_Flammentanz_left
116	Horse8	rClRL	Wrong_Diagonal	11.2157	-11.2157	6.32504335850688	-7.3506	7.3506	6.53944211565394048	8.1789	-8.1789	2.35004344218576	-6.5615	6.5615	2.22286223886337984	left	Don_Flammentanz_left
117	Horse8	uS	Unridden	-0.2700	-0.2700	4.10091699719963968	8.1680	8.1680	10.3646260805615008	-4.4469	-4.4469	2.46796353140236992	4.5361	4.5361	1.67757570307272992	nolead	Don_Flammentanz_nolead
118	Horse9	rClH	HuntC	1.6849	-1.6849	4.56528042377390016	5.5955	-5.5955	5.3839538235154496	4.7252	-4.7252	2.00463972298876	4.0795	-4.0795	1.50061717842392992	left	Fender_left
119	Horse9	rClRR	Correct_Diagonal	-6.8969	6.8969	8.52159078460863872	8.2115	-8.2115	4.52058075453054016	4.4608	-4.4608	1.90445561714731008	9.3248	-9.3248	1.62132256952868	left	Fender_left
120	Horse9	rClRL	Wrong_Diagonal	10.4732	-10.4732	8.43114155089011968	2.4500	-2.4500	5.00398056767572032	7.1703	-7.1703	1.76371481504001984	-0.7680	0.7680	1.65620797997177984	left	Fender_left
121	Horse9	rClS	SittingC	1.9190	-1.9190	10.50152846418	10.6219	-10.6219	6.14356812754190976	5.7911	-5.7911	2.22395330584076	2.9855	-2.9855	2.30879423267092992	left	Fender_left
122	Horse9	rCrS	SittingC	19.5523	19.5523	10.0269698542972	-11.7941	-11.7941	8.90548754342603904	4.9566	4.9566	2.56353882415228992	2.0792	2.0792	2.53759502341495008	right	Fender_right
123	Horse9	rCrRL	Correct_Diagonal	1.3303	1.3303	9.09932335974329984	-4.7962	-4.7962	6.20501642567708032	2.8146	2.8146	1.97871898828420992	7.3960	7.3960	1.51806885170208992	right	Fender_right
124	Horse9	rCrRR	Wrong_Diagonal	24.7361	24.7361	10.8883126224415008	-12.0361	-12.0361	7.76360810343353984	8.4210	8.4210	2.57181848180231008	0.4853	0.4853	1.97614951689606016	right	Fender_right
125	Horse9	rCrH	HuntC	2.1792	2.1792	6.09610865312483968	3.7734	3.7734	5.5862095006707104	7.4432	7.4432	1.69766843665271008	2.1972	2.1972	1.59638708644204	right	Fender_right
126	Horse9	rSS	Sitting	12.7262	12.7262	7.04779006754279936	-6.2979	-6.2979	5.27861990005934016	2.1415	2.1415	1.91305312673420992	3.6844	3.6844	1.61315953274116	nolead	Fender_nolead
127	Horse9	rSH	Hunt	-1.1079	-1.1079	2.88048642145031008	4.9201	4.9201	4.55247010817993024	2.1071	2.1071	2.3286087327176	0.3005	0.3005	2.20863145350324992	nolead	Fender_nolead
128	Horse9	rSRL	Rising	-0.6033	0.6033	5.5842932701585504	-0.4381	0.4381	4.09923647779312	1.7498	-1.7498	2.12266116581308	-5.4890	5.4890	1.66160755107747008	nolead	Fender_nolead
129	Horse9	rSRR	Rising	16.3504	16.3504	5.70289380732001984	-10.9602	-10.9602	4.22441319406809984	3.2056	3.2056	2.49544328523312992	-2.1768	-2.1768	1.47073170386275008	nolead	Fender_nolead
130	Horse9	uCl	UnriddenC	5.1676	-5.1676	3.2231518535604	6.6542	-6.6542	4.60450544011690944	4.9195	-4.9195	2.33117534264046016	2.7612	-2.7612	2.06743485368811008	left	Fender_left
131	Horse9	uCr	UnriddenC	-5.4702	-5.4702	3.40747160804436992	4.5136	4.5136	5.97367493736235008	7.1686	7.1686	2.45209193656832	1.1425	1.1425	2.51576002138828992	right	Fender_right
132	Horse9	uS	Unridden	-1.6013	-1.6013	6.78267663416340096	2.9196	2.9196	7.58777707888339968	-2.2203	-2.2203	3.45135692235953024	-1.4215	-1.4215	3.35652783986337984	nolead	Fender_nolead
133	Horse10	uS	Unridden	-1.3527	-1.3527	7.45491577212902016	-9.2082	-9.2082	8.4401083167343104	4.1069	4.1069	3.58330759788540992	-0.0449	-0.0449	10.1733472665408992	nolead	First_Kikkoman_nolead
134	Horse10	uCl	UnriddenC	-4.3907	4.3907	5.76530113640466944	1.7128	-1.7128	7.43824031115616	3.0138	-3.0138	3.15531075499518976	-1.0463	1.0463	2.59752632885630016	left	First_Kikkoman_left
135	Horse10	uCr	UnriddenC	-7.6514	-7.6514	5.98392590748817024	-10.5072	-10.5072	4.55102505944990016	11.6968	11.6968	2.42679371796941024	-6.2360	-6.2360	3.3593392642209696	right	First_Kikkoman_right
136	Horse10	rSRL	Rising	-2.8120	2.8120	10.5865665914691008	-8.6276	8.6276	13.4368059279464016	2.4524	-2.4524	4.75319493325206016	2.8172	-2.8172	4.55622533703910976	nolead	First_Kikkoman_nolead
137	Horse10	rSRR	Rising	-1.0949	-1.0949	6.64175820718580096	-15.9427	-15.9427	13.0121810272532992	4.0333	4.0333	4.22240064018609984	-10.7429	-10.7429	4.80853495434670976	nolead	First_Kikkoman_nolead
138	Horse10	rSH	Hunt	-4.0568	-4.0568	4.38882998593537984	-1.8925	-1.8925	6.02705553533042944	4.5830	4.5830	2.72335673244685024	-3.2473	-3.2473	3.87748196230308992	nolead	First_Kikkoman_nolead
139	Horse10	rSS	Sitting	-3.3823	-3.3823	6.85894754252690048	-6.3824	-6.3824	12.8671697259038	1.7585	1.7585	5.69722483242644032	-4.4223	-4.4223	5.87390438856841984	nolead	First_Kikkoman_nolead
140	Horse10	rClRR	Correct_Diagonal	-5.1829	5.1829	7.10651249502918016	-2.8890	2.8890	12.4786277421159008	1.3883	-1.3883	3.17723962803958976	2.8845	-2.8845	2.98547218671985024	left	First_Kikkoman_left
141	Horse10	rClRL	Wrong_Diagonal	4.5024	-4.5024	7.72654601317506048	-15.6448	15.6448	7.71608604932048	1.6294	-1.6294	3.24732023343056	-3.0227	3.0227	2.73252681962819008	left	First_Kikkoman_left
142	Horse10	rClH	HuntC	1.6939	-1.6939	4.35027172843571968	1.7149	-1.7149	6.9464333998500096	0.0555	-0.0555	3.13028504724312	-1.8473	1.8473	2.9089398495559904	left	First_Kikkoman_left
143	Horse10	rClS	SittingC	-4.3625	4.3625	8.60791295119659008	-7.8520	7.8520	13.2445950908124	-0.1749	0.1749	4.66756664166997056	0.5500	-0.5500	2.83682075758800992	left	First_Kikkoman_left
144	Horse10	rCrH	HuntC	-1.0938	-1.0938	4.66434221550694976	-5.5900	-5.5900	9.44092552245673088	11.4332	11.4332	3.33664181259550016	-8.4712	-8.4712	4.13962872980406976	right	First_Kikkoman_right
145	Horse10	rCrRL	Correct_Diagonal	2.2451	2.2451	5.90962901093998976	-12.6421	-12.6421	11.074045497522	5.8645	5.8645	3.67733506060702016	-3.8699	-3.8699	3.28561271782950976	right	First_Kikkoman_right
146	Horse10	rCrRR	Wrong_Diagonal	1.6008	1.6008	7.3572614959499904	-15.2483	-15.2483	9.64737307397238016	6.7024	6.7024	3.50677432704953984	-13.1587	-13.1587	3.34544530979284992	right	First_Kikkoman_right
147	Horse10	rCrS	SittingC	3.2404	3.2404	11.4639354478470992	-19.2815	-19.2815	13.3746560503191984	-1.2273	-1.2273	8.7320810170908096	-18.3368	-18.3368	9.7405021480083392	right	First_Kikkoman_right
148	Horse11	uCl	UnriddenC	-0.6138	0.6138	4.20744176469804992	-7.2547	7.2547	6.1435733158677696	4.3058	-4.3058	2.18618570719673024	1.6675	-1.6675	2.28204951688696	left	Flash_Dance_left
149	Horse11	uCr	UnriddenC	0.2340	0.2340	4.37539596915869056	3.2941	3.2941	3.19796514948891008	-1.8008	-1.8008	1.88126901592442016	0.8724	0.8724	2.40881344357193984	right	Flash_Dance_right
150	Horse11	uS	Unridden	0.0473	0.0473	6.21115925808611968	3.2651	3.2651	5.57510514691939008	-1.5136	-1.5136	2.35686598993719008	0.5318	0.5318	2.79202206689019008	nolead	Flash_Dance_nolead
151	Horse11	rClRR	Correct_Diagonal	20.1840	-20.1840	14.2361856400024016	0.3432	-0.3432	5.1429328043277696	1.5621	-1.5621	2.51157194915223008	5.0772	-5.0772	2.38349804236410016	left	Flash_Dance_left
152	Horse11	rClRL	Wrong_Diagonal	22.1897	-22.1897	16.0491217928680992	-7.0913	7.0913	6.20827285995697024	6.2151	-6.2151	2.11213628897116	-3.6846	3.6846	2.18837947079092	left	Flash_Dance_left
153	Horse11	rClH	HuntC	8.7780	-8.7780	4.73202282547372992	-13.5583	13.5583	6.57007439855676032	3.8205	-3.8205	2.21763395505742016	0.4094	-0.4094	2.49734017959010016	left	Flash_Dance_left
154	Horse11	rClS	SittingC	19.3503	-19.3503	13.7187231976445008	-5.6952	5.6952	6.33869385761326976	4.1922	-4.1922	2.59307110602975008	0.6683	-0.6683	3.15640274871483968	left	Flash_Dance_left
155	Horse11	rCrH	HuntC	5.0687	5.0687	2.57355741865952992	5.1340	5.1340	7.67353784719260032	1.5517	1.5517	2.45359232288546016	-1.5327	-1.5327	2.41912211708647008	right	Flash_Dance_right
156	Horse11	rCrRL	Correct_Diagonal	7.3606	7.3606	9.0088443067444608	-1.6206	-1.6206	8.0843430631425792	1.2960	1.2960	3.12514090694204992	1.6075	1.6075	3.87642984278845952	right	Flash_Dance_right
157	Horse11	rCrRR	Wrong_Diagonal	12.4605	12.4605	9.80945770176857088	-14.0207	-14.0207	7.18020252359110016	5.9403	5.9403	2.98199805507632	-3.8897	-3.8897	3.12424126843243968	right	Flash_Dance_right
158	Horse11	rCrS	SittingC	10.2796	10.2796	10.399649474854	-10.2299	-10.2299	6.90501001225771008	2.8737	2.8737	2.57950195188532	-4.6329	-4.6329	3.94709113134310016	right	Flash_Dance_right
159	Horse11	rSH	Hunt	0.2418	0.2418	3.89006600873872	10.7188	10.7188	3.18120788209948992	-0.4587	-0.4587	2.9002838851439104	0.2226	0.2226	2.01390795772592992	nolead	Flash_Dance_nolead
160	Horse11	rSS	Sitting	-3.0685	-3.0685	7.40740478414769024	1.7292	1.7292	5.4297483612740096	-1.0240	-1.0240	1.96336074264871008	-2.9390	-2.9390	1.87041258156450016	nolead	Flash_Dance_nolead
161	Horse11	rSRR	Rising	0.7181	0.7181	8.13596489343244032	-2.8619	-2.8619	6.64174390632259072	1.0840	1.0840	2.96855417245766976	-6.5789	-6.5789	2.90925602990675968	nolead	Flash_Dance_nolead
162	Horse11	rSRL	Rising	12.5801	-12.5801	17.2817390926676	-6.0446	6.0446	22.1934201907263008	3.8482	-3.8482	2.60048783080456992	-2.3921	2.3921	2.08480903018224032	nolead	Flash_Dance_nolead
163	Horse13	uS	Unridden	2.7924	2.7924	3.07840930523006016	5.6129	5.6129	4.24663600809739008	-4.9067	-4.9067	2.08862569581919008	-4.9918	-4.9918	3.05189577323533952	nolead	Hipson_nolead
164	Horse13	uCr	UnriddenC	2.0780	2.0780	4.09914492900500992	2.0250	2.0250	5.38011898689931968	-2.8907	-2.8907	2.19990637352929984	0.1519	0.1519	1.71672250101083008	right	Hipson_right
165	Horse13	uCl	UnriddenC	1.8177	-1.8177	3.19818139976524992	-1.8233	1.8233	3.08816523708619008	5.9996	-5.9996	2.31151693608819008	1.8097	-1.8097	2.43468994005799008	left	Hipson_left
166	Horse13	rSRR	Rising	-1.7699	-1.7699	11.5912592026836	-3.0890	-3.0890	4.55234645908036032	-4.5034	-4.5034	1.60755609019992	-1.8016	-1.8016	1.19536694762948	nolead	Hipson_nolead
167	Horse13	rSRL	Rising	9.0866	-9.0866	8.96665999777723904	-8.2113	8.2113	5.18611549730085632	6.5072	-6.5072	2.8367187637367056	1.0744	-1.0744	1.3952801632987224	nolead	Hipson_nolead
168	Horse13	rSH	Hunt	-4.8930	-4.8930	5.81581608295902976	5.4739	5.4739	4.24594696897662976	-4.1603	-4.1603	2.16388566849392992	-1.0698	-1.0698	3.10907641466788992	nolead	Hipson_nolead
169	Horse13	rSS	Sitting	-7.0405	-7.0405	11.521648826008	3.8867	3.8867	5.92658482137884032	-4.6151	-4.6151	2.22096995072288032	-1.3412	-1.3412	2.37006226697489024	nolead	Hipson_nolead
170	Horse13	rCrRL	Correct_Diagonal	-0.3369	-0.3369	16.3790109157457984	3.8348	3.8348	8.01606865609307904	-6.3233	-6.3233	2.66786267660519008	0.8560	0.8560	2.33979764103925984	right	Hipson_right
171	Horse13	rCrRR	Wrong_Diagonal	15.5052	15.5052	16.0572625540417984	-5.7403	-5.7403	10.6789688692438992	-3.4987	-3.4987	2.51950723833875968	0.6718	0.6718	2.38818365104612992	right	Hipson_right
172	Horse13	rCrS	SittingC	10.8763	10.8763	11.9045877791817008	2.8666	2.8666	6.10613616929568	-2.8349	-2.8349	2.45484871480126016	0.7269	0.7269	1.99410888350830016	right	Hipson_right
173	Horse13	rCrH	HuntC	5.8432	5.8432	5.99892727431796992	0.6364	0.6364	4.61461609365595008	-0.2456	-0.2456	2.49288094107214016	-0.2719	-0.2719	2.12842849967056992	right	Hipson_right
174	Horse13	rClRR	Correct_Diagonal	14.7341	-14.7341	11.1150402776044	-6.1277	6.1277	4.20391593538537024	2.0612	-2.0612	2.81149000964368	2.3127	-2.3127	1.92274044579283008	left	Hipson_left
175	Horse13	rClRL	Wrong_Diagonal	21.3558	-21.3558	12.2077089530585984	-7.5639	7.5639	4.14166876322838016	5.5278	-5.5278	2.47565199660168	1.2548	-1.2548	2.37894518953654976	left	Hipson_left
176	Horse13	rClH	HuntC	16.1991	-16.1991	8.09003392100630912	-10.6039	10.6039	5.95643313812739968	3.9969	-3.9969	3.12421592394577984	1.9884	-1.9884	2.93620645762212992	left	Hipson_left
177	Horse13	rClS	SittingC	16.8461	-16.8461	11.5391399832914992	-6.8088	6.8088	3.31633401432329024	2.9895	-2.9895	2.49453917750274016	1.3486	-1.3486	2.98979792561090048	left	Hipson_left
178	Horse14	rCrS	SittingC	1.4008	1.4008	13.5402259149061984	-1.7882	-1.7882	7.82546436224809984	7.1838	7.1838	1.74298140199755008	-4.1241	-4.1241	2.44628470838462016	right	Jet_Mail_right
179	Horse14	rCrH	HuntC	5.0759	5.0759	2.12393793591538016	4.7561	4.7561	3.38962343585833984	7.7558	7.7558	1.88315672212492992	-6.1236	-6.1236	2.72440403035382016	right	Jet_Mail_right
180	Horse14	rCrRL	Correct_Diagonal	1.2697	1.2697	10.3662769410598992	-4.6426	-4.6426	7.1397213561084096	4.0171	4.0171	1.97619793485022016	-2.5282	-2.5282	1.94525867600444992	right	Jet_Mail_right
181	Horse14	rCrRR	Wrong_Diagonal	8.6131	8.6131	11.9672585494850992	-9.6751	-9.6751	7.43761974280003968	10.0357	10.0357	1.57985956607513984	-6.5465	-6.5465	1.93195138605528992	right	Jet_Mail_right
182	Horse14	rClS	SittingC	-3.8241	3.8241	10.4425906224377008	-14.4068	14.4068	7.05356909140166016	0.3554	-0.3554	2.00650246017714016	0.8454	-0.8454	2.79883700017962016	left	Jet_Mail_left
183	Horse14	rClH	HuntC	0.4334	-0.4334	3.79719784025140992	-4.1474	4.1474	4.69918493736201024	0.7311	-0.7311	1.94441457740323008	1.2159	-1.2159	2.82702826869022016	left	Jet_Mail_left
184	Horse14	rClRR	Correct_Diagonal	-15.9802	15.9802	14.8993291764260992	-10.4429	10.4429	8.09174145818349056	-2.2433	2.2433	2.10682406281184032	4.8590	-4.8590	1.57081474813451008	left	Jet_Mail_left
185	Horse14	rClRL	Wrong_Diagonal	8.8909	-8.8909	7.1210207176581504	-8.5702	8.5702	5.33719865532937984	2.6745	-2.6745	1.37888989102274	0.2563	-0.2563	2.12268789693135008	left	Jet_Mail_left
186	Horse14	rSS	Sitting	5.3641	5.3641	6.45760621839554944	-0.8680	-0.8680	5.7688870087247296	4.0606	4.0606	1.80540695279774016	-3.6751	-3.6751	2.08613927645756	nolead	Jet_Mail_nolead
187	Horse14	rSH	Hunt	1.0683	1.0683	4.11537345627450944	0.7280	0.7280	4.13423672853433024	2.5624	2.5624	1.87124554028348	-6.5257	-6.5257	1.90376973247135008	nolead	Jet_Mail_nolead
188	Horse14	rSRR	Rising	10.8376	10.8376	6.4148729606078592	-0.8702	-0.8702	4.742721522838	5.9819	5.9819	1.45186356403949984	-7.4745	-7.4745	1.65384712072171008	nolead	Jet_Mail_nolead
189	Horse14	rSRL	Rising	5.2109	-5.2109	8.14000662310190976	-2.1668	2.1668	4.85661639664296	0.0337	-0.0337	2.26578176268994016	2.8985	-2.8985	1.92132270151428	nolead	Jet_Mail_nolead
190	Horse14	uCr	UnriddenC	4.4143	4.4143	3.08520347075184	4.0465	4.0465	4.66460617795155072	6.8514	6.8514	1.60590756102639008	-4.5834	-4.5834	2.48899048525996992	right	Jet_Mail_right
191	Horse14	uCl	UnriddenC	0.5514	-0.5514	2.09606893706793024	-0.3422	0.3422	3.70010557391481984	0.3380	-0.3380	1.72458868867487008	1.9238	-1.9238	1.58943729199104	left	Jet_Mail_left
192	Horse14	uS	Unridden	-0.7206	-0.7206	2.81522559128455008	1.3622	1.3622	6.11249850869238016	3.2551	3.2551	2.01773490956564992	-3.5809	-3.5809	2.91510159187278016	nolead	Jet_Mail_nolead
193	Horse15	uCr	UnriddenC	5.1081	5.1081	4.36483358942641984	-1.9345	-1.9345	7.65038114917636992	1.2782	1.2782	3.98218722525345984	-7.3006	-7.3006	3.26794316655123008	right	King_of_Dutchmen_right
194	Horse15	uS	Unridden	10.3523	10.3523	6.14219801918360064	-8.0859	-8.0859	7.15686325686667008	-2.9804	-2.9804	2.91702154844169984	-3.9313	-3.9313	2.59708114549428	nolead	King_of_Dutchmen_nolead
195	Horse15	rClS	SittingC	14.2238	-14.2238	12.5335714695124992	13.8863	-13.8863	9.5517466186227904	8.3568	-8.3568	3.78454128682732032	-0.0558	0.0558	4.21781237306729024	left	King_of_Dutchmen_left
196	Horse15	rClH	HuntC	1.0119	-1.0119	5.78604670085907072	10.6549	-10.6549	8.8727216906211008	11.6870	-11.6870	3.99743457638211968	2.7334	-2.7334	3.22378367678550016	left	King_of_Dutchmen_left
197	Horse15	rClRR	Correct_Diagonal	11.9149	-11.9149	9.7067536264905408	10.6773	-10.6773	8.79037725418816	5.0009	-5.0009	3.88626176320059968	5.9970	-5.9970	2.85427842449239008	left	King_of_Dutchmen_left
198	Horse15	rClRL	Wrong_Diagonal	20.5317	-20.5317	7.05424282179884928	6.9561	-6.9561	6.86307716016036992	12.3366	-12.3366	4.02761584046208064	4.3659	-4.3659	3.23822723708027008	left	King_of_Dutchmen_left
199	Horse15	rCrH	HuntC	15.1902	15.1902	7.72516694994742016	-9.7525	-9.7525	7.15362259911273984	3.4294	3.4294	4.50169480249302976	-11.0582	-11.0582	3.55344619557163968	right	King_of_Dutchmen_right
200	Horse15	rCrS	SittingC	5.6251	5.6251	8.38326931982388992	-15.2198	-15.2198	7.42777921040125056	-1.7888	-1.7888	4.7454676968475296	-10.6633	-10.6633	3.65419342577459968	right	King_of_Dutchmen_right
201	Horse15	rCrRL	Correct_Diagonal	8.5308	8.5308	9.60470335717329024	-12.7975	-12.7975	10.3096876075282016	-4.0885	-4.0885	3.05765031584491008	-5.5702	-5.5702	4.08049194166661952	right	King_of_Dutchmen_right
202	Horse15	rCrRR	Wrong_Diagonal	17.1486	17.1486	9.4717876280824	-16.1702	-16.1702	8.06569196671316864	0.5332	0.5332	2.73722230221282976	-7.9921	-7.9921	3.10715241196529984	right	King_of_Dutchmen_right
203	Horse15	rSS	Sitting	1.7051	1.7051	8.06345027854911104	-13.4129	-13.4129	12.7529278306882	-2.2463	-2.2463	3.3972356087448096	-7.5471	-7.5471	2.45014538970011008	nolead	King_of_Dutchmen_nolead
204	Horse15	rSH	Hunt	1.2163	1.2163	7.32670587395122944	5.1027	5.1027	12.5339649239776992	-0.6914	-0.6914	2.40219085151179008	-5.8361	-5.8361	2.39506415771899008	nolead	King_of_Dutchmen_nolead
205	Horse15	rSRR	Rising	3.3568	3.3568	6.59657967406643968	-14.3980	-14.3980	7.74139645263356928	0.2092	0.2092	2.58764649480053984	-10.9431	-10.9431	2.45058258680447008	nolead	King_of_Dutchmen_nolead
206	Horse15	rSRL	Rising	5.0175	-5.0175	6.06629743590893952	9.9605	-9.9605	5.52664049426398016	8.6994	-8.6994	2.42487506519988992	5.3104	-5.3104	2.22205769243335008	nolead	King_of_Dutchmen_nolead
207	Horse15	uCl	UnriddenC	0.1587	-0.1587	4.84926381229612928	2.8375	-2.8375	6.27916520625888	6.4486	-6.4486	2.58396501401746016	0.3339	-0.3339	3.49016985023339968	left	King_of_Dutchmen_left
208	Horse16	rSS	Sitting	0.9260	0.9260	5.52708768689702016	-6.7298	-6.7298	3.94015905749692992	1.9428	1.9428	3.36791161227916992	1.7310	1.7310	2.28106750499220992	nolead	Mazack_nolead
209	Horse16	rSRR	Rising	-3.3179	-3.3179	3.84504890496494016	5.8938	5.8938	4.57135618860042048	-4.7765	-4.7765	3.75283486772790976	0.6686	0.6686	2.11415278695544992	nolead	Mazack_nolead
210	Horse16	rSRL	Rising	-1.2742	1.2742	6.23975617939954048	2.8240	-2.8240	5.00592279265006976	-2.0495	2.0495	3.08795127245414016	-6.0326	6.0326	1.38288820453547008	nolead	Mazack_nolead
211	Horse16	rSH	Hunt	1.9877	1.9877	4.1933928119376	-6.3260	-6.3260	4.98499021962502016	2.0173	2.0173	3.20191948968539008	3.9212	3.9212	2.52398599008993984	nolead	Mazack_nolead
212	Horse16	rClH	HuntC	0.5076	-0.5076	5.44203055699633984	1.5838	-1.5838	6.55928582207346048	8.4074	-8.4074	3.15753147270904	-4.6020	4.6020	3.04991481970052992	left	Mazack_left
213	Horse16	rClRR	Correct_Diagonal	-1.4886	1.4886	9.94052739948370048	2.0493	-2.0493	6.3514263914972096	5.8962	-5.8962	2.40121623726667008	0.3615	-0.3615	1.90576500795912992	left	Mazack_left
214	Horse16	rClRL	Wrong_Diagonal	-0.1442	0.1442	9.17251826984288896	3.8995	-3.8995	7.93626905405628032	6.2358	-6.2358	2.73240474865436	-7.8978	7.8978	2.44487419879108992	left	Mazack_left
215	Horse16	rClS	SittingC	-4.1932	4.1932	9.47768451430992128	1.9538	-1.9538	9.07175709685320064	7.4705	-7.4705	2.70608479268378016	-1.9849	1.9849	2.06359715972405984	left	Mazack_left
216	Horse16	rCrH	HuntC	9.6683	9.6683	6.89542102292003072	-3.7821	-3.7821	7.97697998399826944	12.2363	12.2363	2.86977635615297024	4.7405	4.7405	2.90804521456273984	right	Mazack_right
217	Horse16	rCrRL	Correct_Diagonal	10.9199	10.9199	9.7649015803610112	-3.5682	-3.5682	6.6757561768548608	9.6744	9.6744	2.01240168546	6.0889	6.0889	1.72446833866660992	right	Mazack_right
218	Horse16	rCrRR	Wrong_Diagonal	12.2336	12.2336	6.79310546649868032	-5.2620	-5.2620	6.1274815437391296	10.1545	10.1545	2.47168830429925024	0.8504	0.8504	1.66834022458077984	right	Mazack_right
219	Horse16	rCrS	SittingC	14.5207	14.5207	12.6729135255410992	-3.0423	-3.0423	10.1672824258658	9.8291	9.8291	2.63890348052686016	4.0248	4.0248	2.07598459316192	right	Mazack_right
220	Horse16	uS	Unridden	1.4649	1.4649	2.05540754297792032	-2.1227	-2.1227	3.10307119791059008	1.5955	1.5955	3.50747520568393984	4.6944	4.6944	2.34505038077677024	nolead	Mazack_nolead
221	Horse16	uCl	UnriddenC	-3.8025	3.8025	3.14339638138548032	0.8774	-0.8774	5.13026969316667008	5.8208	-5.8208	2.35840276110044	-3.8197	3.8197	2.97382691832464	left	Mazack_left
222	Horse16	uCr	UnriddenC	4.5801	4.5801	2.42110808066306016	-5.2956	-5.2956	3.33851827464468992	7.3376	7.3376	1.63560140126406016	4.4569	4.4569	1.82687882649849024	right	Mazack_right
223	Horse17	rSS	Sitting	-1.8142	-1.8142	11.0145583682263008	3.8730	3.8730	7.69075010390957952	0.9304	0.9304	2.20551207732474016	0.6511	0.6511	2.94670691414795968	nolead	Medina_nolead
224	Horse17	rSRR	Rising	-2.9275	-2.9275	12.5762036010114992	1.3933	1.3933	5.83046620049139968	4.2986	4.2986	2.16274511855392	-6.4569	-6.4569	2.63880778099782016	nolead	Medina_nolead
225	Horse17	rSRL	Rising	5.0343	-5.0343	11.4816097036189008	0.0217	-0.0217	8.13555131919510016	2.5956	-2.5956	2.07567540441763008	-5.5786	5.5786	2.11072397846937984	nolead	Medina_nolead
226	Horse17	rSH	Hunt	3.8788	3.8788	2.78105743323654976	-0.2407	-0.2407	2.82551800670489984	0.7119	0.7119	1.363254941321	-0.3488	-0.3488	2.29612580625352	nolead	Medina_nolead
227	Horse17	rCrH	HuntC	5.1768	5.1768	2.86709122633912992	3.0969	3.0969	3.08502923603444032	5.1819	5.1819	2.18951774441528992	0.1540	0.1540	2.66285584662512032	right	Medina_right
228	Horse17	rCrS	SittingC	1.8963	1.8963	21.8187774528782912	5.4477	5.4477	11.9347304692625952	4.3537	4.3537	2.68150305786284256	2.5970	2.5970	3.28513030507846528	right	Medina_right
229	Horse17	rCrRL	Correct_Diagonal	-12.7176	-12.7176	23.9776205227514016	5.2162	5.2162	14.3240358016411008	0.8046	0.8046	2.29691503766535008	4.6535	4.6535	2.48121248439503968	right	Medina_right
230	Horse17	rCrRR	Wrong_Diagonal	6.2330	6.2330	30.2478222078180032	15.7463	15.7463	20.6764557037415008	5.3649	5.3649	2.28942958669340992	-2.7079	-2.7079	2.71756288113761984	right	Medina_right
231	Horse17	rClS	SittingC	-12.8731	12.8731	34.1654638307942016	1.2423	-1.2423	24.0893109308085024	-1.1065	1.1065	2.9333549798715904	-0.3492	0.3492	3.57594444114014016	left	Medina_left
232	Horse17	rClRR	Correct_Diagonal	5.9146	-5.9146	22.2397208912874016	8.8140	-8.8140	15.1089633064969024	-2.3724	2.3724	2.6167118772882	6.0527	-6.0527	3.55893092150737984	left	Medina_left
233	Horse17	rClRL	Wrong_Diagonal	-1.4285	1.4285	25.8097089184240992	7.4057	-7.4057	13.1557398400249008	1.7104	-1.7104	2.02714923563461024	1.0980	-1.0980	2.68885770010730016	left	Medina_left
234	Horse17	rClH	HuntC	1.5323	-1.5323	5.02100198462456	1.1265	-1.1265	4.10507253733523008	0.1415	-0.1415	2.34772938478108992	0.8497	-0.8497	1.67804983502068	left	Medina_left
235	Horse17	uS	Unridden	3.6252	3.6252	5.09962376924566976	-3.5772	-3.5772	4.13543120895838976	0.9763	0.9763	2.93253129948507008	-1.0651	-1.0651	2.97241457793014976	nolead	Medina_nolead
236	Horse17	uCl	UnriddenC	-4.1110	4.1110	5.02693407547165952	8.4562	-8.4562	4.17845594273048	1.1402	-1.1402	2.28257549234845984	-1.2504	1.2504	2.31609179554671008	left	Medina_left
237	Horse17	uCr	UnriddenC	3.4518	3.4518	3.2810028584836896	1.5625	1.5625	3.62112576554726016	5.1235	5.1235	2.45665018826649984	-1.6968	-1.6968	2.81618387380287008	right	Medina_right
238	Horse18	uCl	UnriddenC	3.2981	-3.2981	3.8079917473761504	-17.9644	17.9644	6.48877702748306048	-4.9712	4.9712	2.24673959744781024	3.3213	-3.3213	2.01727031678453984	left	Metallic_left
239	Horse18	uCr	UnriddenC	1.5827	1.5827	4.39559427531768	-3.3052	-3.3052	5.93235423760544	3.4043	3.4043	1.56986633138662976	-4.6275	-4.6275	1.9292574227008	right	Metallic_right
240	Horse18	uS	Unridden	3.3050	3.3050	5.61248787465052928	2.7259	2.7259	5.67716776324029056	3.0725	3.0725	2.07360661769768	-2.6821	-2.6821	2.70512591756292992	nolead	Metallic_nolead
241	Horse18	rClS	SittingC	13.9394	-13.9394	17.5750065572424992	0.1841	-0.1841	7.51846245323853952	-6.1043	6.1043	2.12890585113078976	2.2014	-2.2014	3.81370216565390976	left	Metallic_left
242	Horse18	rClH	HuntC	13.8415	-13.8415	9.18789288528163072	-3.6716	3.6716	7.63699992038379008	-3.9381	3.9381	2.54767786392081984	3.0732	-3.0732	2.77365777929624	left	Metallic_left
243	Horse18	rClRR	Correct_Diagonal	8.4145	-8.4145	12.7789791656304992	-5.4567	5.4567	7.19057295618806016	-7.6320	7.6320	2.35488506965964032	7.0841	-7.0841	2.34810206867918016	left	Metallic_left
244	Horse18	rClRL	Wrong_Diagonal	26.6611	-26.6611	13.9052978832165984	-1.9332	1.9332	7.62180052808604032	-3.6433	3.6433	2.38721079923430016	-0.3515	0.3515	2.87524566437031008	left	Metallic_left
245	Horse18	rCrS	SittingC	9.9632	9.9632	9.5243249892639296	-2.0811	-2.0811	6.62934606617136	4.8156	4.8156	3.54138958036778048	-7.5537	-7.5537	3.45288859914083968	right	Metallic_right
246	Horse18	rCrH	HuntC	11.7050	11.7050	7.42567475196370944	-12.1055	-12.1055	5.32738556695772992	3.6510	3.6510	2.23959000264617024	-6.1861	-6.1861	2.82320211422173984	right	Metallic_right
247	Horse18	rCrRL	Correct_Diagonal	-2.0399	-2.0399	11.3387581910480992	-0.5491	-0.5491	4.64360755165438976	1.8410	1.8410	2.58408301760586976	-2.3060	-2.3060	3.05319831421476032	right	Metallic_right
248	Horse18	rCrRR	Wrong_Diagonal	17.2665	17.2665	11.4691916538644	-1.0841	-1.0841	7.36362600139331072	5.6316	5.6316	2.49289066581464	-10.4445	-10.4445	3.31111242934014016	right	Metallic_right
249	Horse18	rSS	Sitting	-1.8550	-1.8550	5.55933870552987072	-0.3575	-0.3575	3.47533899581764992	6.4107	6.4107	2.40776053195191008	-5.6337	-5.6337	2.73271367143208	nolead	Metallic_nolead
250	Horse18	rSH	Hunt	0.2360	0.2360	3.75754834952073984	-5.5185	-5.5185	5.1347324868954496	4.8220	4.8220	1.9318752600522	-4.4318	-4.4318	2.23163462650164992	nolead	Metallic_nolead
251	Horse18	rSRL	Rising	10.1238	-10.1238	6.61793935163329024	-2.3756	2.3756	2.63498814447395008	-4.2969	4.2969	3.14147182404523008	1.4428	-1.4428	2.77949214485128	nolead	Metallic_nolead
252	Horse18	rSRR	Rising	-1.5391	-1.5391	6.76685327261616	1.4690	1.4690	4.44266561713044992	8.0251	8.0251	2.38689831457928	-9.7710	-9.7710	2.39980180295716	nolead	Metallic_nolead
253	Horse19	rSRR	Rising	3.6993	3.6993	6.65929225013315072	-2.2323	-2.2323	9.77211334935601024	-4.3360	-4.3360	2.24925836265339008	-6.7692	-6.7692	2.09230521417931008	nolead	Myrten_nolead
254	Horse19	rSRL	Rising	3.9624	-3.9624	5.28996718417528	-8.1035	8.1035	7.05551529789104	6.6330	-6.6330	2.57501857725283968	-3.4344	3.4344	2.3639196886654	nolead	Myrten_nolead
255	Horse19	rSH	Hunt	-0.8489	-0.8489	3.04748860224619968	12.2379	12.2379	3.32597737602558016	-8.0956	-8.0956	2.70096145293311008	-1.9108	-1.9108	2.55266068988336992	nolead	Myrten_nolead
256	Horse19	rSS	Sitting	0.2689	0.2689	6.7512612657509696	1.2843	1.2843	7.53459736026733056	-4.6965	-4.6965	2.19802296643792992	-1.3248	-1.3248	2.25290771387229984	nolead	Myrten_nolead
257	Horse19	rCrRL	Correct_Diagonal	13.1257	13.1257	9.22974634385485952	2.4604	2.4604	11.2117080013128992	-3.2358	-3.2358	2.59290494174853984	2.0211	2.0211	2.99781797077684032	right	Myrten_right
258	Horse19	rCrRR	Wrong_Diagonal	28.7605	28.7605	7.78374193917303936	-8.3795	-8.3795	7.63029924829557504	0.0878	0.0878	2.5269994542825072	-11.0782	-11.0782	2.50773944431404736	right	Myrten_right
259	Horse19	rCrH	HuntC	12.5981	12.5981	4.9629361371842496	0.1999	0.1999	10.7549376653307008	-2.3214	-2.3214	2.90000167880736	-5.0257	-5.0257	4.63303142928367936	right	Myrten_right
260	Horse19	rCrS	SittingC	22.6110	22.6110	11.9706421622427008	-4.5767	-4.5767	14.7073640889827008	-3.1938	-3.1938	2.51777318961525024	-4.4712	-4.4712	3.73964671834928	right	Myrten_right
261	Horse19	rClRR	Correct_Diagonal	4.3167	-4.3167	9.7904933733540608	-8.6653	8.6653	8.00625929571497984	9.4784	-9.4784	2.7654614186796	8.2337	-8.2337	2.52914618068012	left	Myrten_left
262	Horse19	rClRL	Wrong_Diagonal	23.0332	-23.0332	12.2755780402818	-1.2618	1.2618	10.5919149271534	11.5275	-11.5275	2.51573158857096992	-4.9998	4.9998	2.49155530930638976	left	Myrten_left
263	Horse19	rClH	HuntC	11.9650	-11.9650	6.5096366918856704	-3.2508	3.2508	8.65111405663044096	10.6590	-10.6590	2.15014583985173024	1.9317	-1.9317	2.80429348897671008	left	Myrten_left
264	Horse19	rClS	SittingC	16.2859	-16.2859	9.78235885427731968	-9.6919	9.6919	8.90624339968342912	11.0873	-11.0873	2.9520949420526496	3.3275	-3.3275	2.53476384915012	left	Myrten_left
265	Horse19	uS	Unridden	-7.9157	-7.9157	5.85672845112470016	-1.9128	-1.9128	4.75089008633201984	-5.8721	-5.8721	2.45497636604799008	-1.1619	-1.1619	2.74580908453468	nolead	Myrten_nolead
266	Horse19	uCr	UnriddenC	-2.4929	-2.4929	4.80942254660331968	-12.6607	-12.6607	7.06248916579037056	-3.7974	-3.7974	3.74849638188036032	-7.4810	-7.4810	4.19974699183339008	right	Myrten_right
267	Horse19	uCl	UnriddenC	7.8935	-7.8935	3.4367381872816096	-0.7351	0.7351	8.01236934421158016	8.9054	-8.9054	2.91533283875627008	1.5014	-1.5014	2.80903690828219008	left	Myrten_left
268	Horse20	uS	Unridden	7.7431	7.7431	4.56889074015020032	0.0498	0.0498	4.60352858013192	3.2962	3.2962	2.03929023985784	9.0297	9.0297	4.10321109409712	nolead	Puccini_nolead
269	Horse20	uCr	UnriddenC	14.9341	14.9341	4.34274910378972992	-6.0843	-6.0843	4.84079853008830976	5.2148	5.2148	3.14483643107169024	3.1950	3.1950	2.61848028525561024	right	Puccini_right
270	Horse20	uCl	UnriddenC	-6.4655	6.4655	3.30733842593165952	-12.7090	12.7090	5.14173543103081984	-1.0894	1.0894	2.48815883279632992	-5.3616	5.3616	2.76949487340712	left	Puccini_left
271	Horse20	rSH	Hunt	11.4675	11.4675	5.4620831000223904	2.5731	2.5731	4.53760126217593024	2.3396	2.3396	2.8489676867188	2.6206	2.6206	3.20435935867969984	nolead	Puccini_nolead
272	Horse20	rSS	Sitting	4.1048	4.1048	4.64482389982306048	-5.0798	-5.0798	7.39308208224476032	5.0238	5.0238	2.04729180235145024	7.5723	7.5723	3.18355433141148992	nolead	Puccini_nolead
273	Horse20	rSRR	Rising	8.3580	8.3580	3.60314923791451008	-7.4502	-7.4502	3.96959896424499968	5.2231	5.2231	2.82108571612769984	2.6663	2.6663	2.41550238771508	nolead	Puccini_nolead
274	Horse20	rSRL	Rising	-1.5278	1.5278	3.37593656481582016	3.5774	-3.5774	4.28209150206292032	-2.4487	2.4487	1.99316262660622976	-12.6149	12.6149	2.50825636072285984	nolead	Puccini_nolead
275	Horse20	rCrH	HuntC	22.6695	22.6695	4.3695014706096096	-14.2155	-14.2155	7.48843091260729984	9.8301	9.8301	3.03989997944584	1.7150	1.7150	3.57066002734084992	right	Puccini_right
276	Horse20	rCrS	SittingC	18.0660	18.0660	6.63058011034734976	-9.5173	-9.5173	5.25759536769889984	7.1969	7.1969	2.81989090434190016	7.0893	7.0893	3.10819967585219968	right	Puccini_right
277	Horse20	rCrRL	Correct_Diagonal	9.0908	9.0908	5.56833689174500992	-7.3455	-7.3455	4.77207162598003968	3.8825	3.8825	2.51872688180693024	12.5011	12.5011	2.72728001924195008	right	Puccini_right
278	Horse20	rCrRR	Wrong_Diagonal	22.0204	22.0204	7.30883652869745024	-8.4026	-8.4026	6.08444897752574976	7.0732	7.0732	2.88950833476702976	-0.5602	-0.5602	2.68520200580213024	right	Puccini_right
279	Horse20	rClH	HuntC	-4.9624	4.9624	4.37886551238037056	-10.1286	10.1286	6.75760026887465984	-1.8457	1.8457	3.2184461075124096	-8.0350	8.0350	2.66443654639618016	left	Puccini_left
280	Horse20	rClS	SittingC	6.2617	-6.2617	8.22139705054846976	-1.2477	1.2477	4.55565680538324992	-4.1115	4.1115	3.10793266540540992	-7.8563	7.8563	2.578020936409	left	Puccini_left
281	Horse20	rClRR	Correct_Diagonal	-3.5656	3.5656	7.7049426580424896	1.2270	-1.2270	4.63257684846434944	-3.7186	3.7186	2.47353375824472992	-3.1581	3.1581	3.01974343947772032	left	Puccini_left
282	Horse20	rClRL	Wrong_Diagonal	11.1404	-11.1404	9.89051266040084096	-0.2404	0.2404	5.07088556063366976	-2.5222	2.5222	2.63180050317422016	-16.1314	16.1314	2.94402866641128	left	Puccini_left
283	Horse21	uCl	UnriddenC	-7.8205	7.8205	5.8241960509648	-8.1311	8.1311	6.84330547811230976	-3.0067	3.0067	2.53244155995336992	0.7498	-0.7498	3.77072460904108032	left	Ravaillac_left
284	Horse21	uCr	UnriddenC	-1.4071	-1.4071	4.00290067650083904	-7.5756	-7.5756	7.20359637682438912	10.4662	10.4662	2.4618082392533216	0.2495	0.2495	1.98428176685959584	right	Ravaillac_right
285	Horse21	uS	Unridden	8.7779	8.7779	5.06246369037867008	9.3086	9.3086	9.89235075877255936	5.1404	5.1404	2.42969639833561024	1.1429	1.1429	2.59275828989748992	nolead	Ravaillac_nolead
286	Horse21	rClRR	Correct_Diagonal	2.5181	-2.5181	7.55118062727174016	-0.9952	0.9952	9.00096514759865088	-4.4752	4.4752	3.08483882988526016	3.1705	-3.1705	3.1465038711058304	left	Ravaillac_left
287	Horse21	rClRL	Wrong_Diagonal	16.2167	-16.2167	5.5361833748148896	-8.2466	8.2466	6.79285751016188032	1.4790	-1.4790	1.91403750314112	-0.4291	0.4291	2.49002531605088992	left	Ravaillac_left
288	Horse21	rClS	SittingC	7.9522	-7.9522	5.8720696111384704	0.1504	-0.1504	6.50317640726621056	-1.6525	1.6525	2.91269520588689984	3.0440	-3.0440	3.19339859879436032	left	Ravaillac_left
289	Horse21	rClH	HuntC	-6.6448	6.6448	5.75066004525486976	-1.1980	1.1980	8.69157834053270016	-0.2595	0.2595	2.26650831803766016	0.5629	-0.5629	2.72108317392839968	left	Ravaillac_left
290	Horse21	rCrRL	Correct_Diagonal	6.9301	6.9301	6.02410691251218944	1.2959	1.2959	5.81102849874701952	8.1251	8.1251	2.65447800280711008	4.2955	4.2955	2.97738694257691008	right	Ravaillac_right
291	Horse21	rCrRR	Wrong_Diagonal	8.8676	8.8676	6.4546025335976192	-11.2013	-11.2013	7.85278105685053952	13.5588	13.5588	1.90858681068624992	-2.4330	-2.4330	4.11668831755734016	right	Ravaillac_right
292	Horse21	rCrS	SittingC	4.7029	4.7029	8.44736304398500992	-2.0710	-2.0710	8.66721870483537024	8.4494	8.4494	2.18324812073573024	-1.8359	-1.8359	3.01904199136928	right	Ravaillac_right
293	Horse21	rCrH	HuntC	4.5749	4.5749	5.08968290945921024	-0.7995	-0.7995	9.17900254545820032	10.7715	10.7715	1.73217498724786016	-0.9382	-0.9382	2.00753472968890976	right	Ravaillac_right
294	Horse21	rSRL	Rising	1.9214	-1.9214	2.91128954245489984	-7.5371	7.5371	7.21610703826439936	-3.9285	3.9285	2.26131719312008	-5.0043	5.0043	2.04081491155181024	nolead	Ravaillac_nolead
295	Horse21	rSRR	Rising	2.9903	2.9903	4.27867187996432	-4.3063	-4.3063	5.03058663261261952	9.0377	9.0377	1.93561223084501024	-0.6373	-0.6373	1.62236496786860992	nolead	Ravaillac_nolead
296	Horse21	rSS	Sitting	-0.7900	-0.7900	5.56540045405370944	-2.4365	-2.4365	8.64471130297116032	4.5449	4.5449	2.18324195628875008	-0.0025	-0.0025	4.52714576693214016	nolead	Ravaillac_nolead
297	Horse21	rSH	Hunt	5.2585	5.2585	3.99199496802702016	4.0776	4.0776	4.7129711626253696	6.5870	6.5870	1.78855368677736	-2.2523	-2.2523	1.96587351996887008	nolead	Ravaillac_nolead
298	Horse22	uCr	UnriddenC	3.1875	3.1875	3.71889346500225024	7.7458	7.7458	5.79565455176443008	7.5525	7.5525	2.49123926665284	0.6690	0.6690	1.61461877219776	right	Silence_please_right
299	Horse22	uCl	UnriddenC	1.3855	-1.3855	3.53066860951774976	5.5190	-5.5190	5.70221165471157056	4.2494	-4.2494	2.10287216343020992	-0.6523	0.6523	1.63748454665721024	left	Silence_please_left
300	Horse22	uS	Unridden	-2.5626	-2.5626	5.34133998823897024	2.0157	2.0157	9.46335400768339072	0.1584	0.1584	1.54996246079823008	-0.1300	-0.1300	2.43228330515967008	nolead	Silence_please_nolead
301	Horse22	rCrRL	Correct_Diagonal	4.3300	4.3300	9.28599089954916096	-14.9409	-14.9409	9.05039303528221056	2.4723	2.4723	2.13780766784223008	6.5188	6.5188	1.69280556781073024	right	Silence_please_right
302	Horse22	rCrRR	Wrong_Diagonal	11.1606	11.1606	7.94899201966433024	-28.5392	-28.5392	10.0759057785563008	7.5486	7.5486	1.97301496749329984	3.1986	3.1986	1.60634738036284992	right	Silence_please_right
303	Horse22	rCrH	HuntC	3.7804	3.7804	5.59603593521362944	-13.4195	-13.4195	10.3613480069858	6.4079	6.4079	2.62371760540816	2.7359	2.7359	1.73398680908704	right	Silence_please_right
304	Horse22	rCrS	SittingC	7.7758	7.7758	5.13109276298739008	-22.2922	-22.2922	12.8283156335951008	7.3166	7.3166	2.45511523091848992	3.5969	3.5969	2.14849339526188	right	Silence_please_right
305	Horse22	rClRR	Correct_Diagonal	8.5242	-8.5242	5.64385387065706048	-6.0212	6.0212	9.67082957114553984	2.6654	-2.6654	2.14543618184872032	3.1642	-3.1642	1.67382662696575008	left	Silence_please_left
306	Horse22	rClRL	Wrong_Diagonal	19.8980	-19.8980	5.55595148066158976	-8.7435	8.7435	7.91721741939867008	8.6336	-8.6336	1.85569414007032992	1.0606	-1.0606	1.26443920646394	left	Silence_please_left
307	Horse22	rClH	HuntC	8.3535	-8.3535	7.29887070634616064	-7.3224	7.3224	10.6898925874908	5.8916	-5.8916	2.77068659443796992	2.5268	-2.5268	1.76003479051793024	left	Silence_please_left
308	Horse22	rClS	SittingC	17.4582	-17.4582	5.55079333818740032	-7.9343	7.9343	12.1657868263883008	5.3254	-5.3254	2.01985399269601024	2.2434	-2.2434	1.64596334190316992	left	Silence_please_left
309	Horse22	rSRR	Rising	-0.2514	-0.2514	8.27411862599256064	-13.8469	-13.8469	11.9302324134905008	1.6449	1.6449	2.75711466069998016	-2.1021	-2.1021	1.88822069361795008	nolead	Silence_please_nolead
310	Horse22	rSRL	Rising	5.1959	-5.1959	5.26326089125214592	5.6295	-5.6295	8.79950454820809344	3.2381	-3.2381	3.2499926295399616	-1.3397	1.3397	1.1238404147895096	nolead	Silence_please_nolead
311	Horse22	rSS	Sitting	-3.4554	-3.4554	5.03102141284696	5.8047	5.8047	16.0226801143752	-1.3002	-1.3002	2.77743068706403008	-2.0106	-2.0106	1.87125159195444992	nolead	Silence_please_nolead
312	Horse22	rSH	Hunt	-1.4330	-1.4330	3.64730970108244032	17.4878	17.4878	13.4769750664124	-1.2252	-1.2252	2.20246076644693984	-4.3599	-4.3599	1.98709990411070016	nolead	Silence_please_nolead
313	Horse24	uCl	UnriddenC	-0.1838	0.1838	4.61347584689966976	4.8322	-4.8322	5.12752920648742016	2.7354	-2.7354	2.55362120442504992	-0.5859	0.5859	2.60097987207374976	left	Vilja_left
314	Horse24	uCr	UnriddenC	5.3957	5.3957	4.13998348577146048	3.5183	3.5183	5.58822551248745984	11.6428	11.6428	2.42356428279089024	2.6502	2.6502	2.45493105297297984	right	Vilja_right
315	Horse24	rClS	SittingC	3.0833	-3.0833	8.77755141691648128	6.6677	-6.6677	8.85616918688701056	0.4674	-0.4674	2.48463475416712	-0.6397	0.6397	1.84044129646779008	left	Vilja_left
316	Horse24	rClH	HuntC	2.6669	-2.6669	3.52319229374046976	0.5888	-0.5888	5.07604409143691008	3.4454	-3.4454	2.12728423615451008	0.5143	-0.5143	1.73146348113266976	left	Vilja_left
317	Horse24	rClRR	Correct_Diagonal	-7.0506	7.0506	6.71614635277741952	7.8842	-7.8842	5.70306308877435008	-2.6673	2.6673	2.11365085560117024	2.4394	-2.4394	1.97375559484905984	left	Vilja_left
318	Horse24	rClRL	Wrong_Diagonal	11.7815	-11.7815	7.65919124797904896	2.7878	-2.7878	7.26480677208665984	4.3670	-4.3670	2.18152921942636	-1.4290	1.4290	1.61490925136443008	left	Vilja_left
319	Horse24	rCrS	SittingC	12.2094	12.2094	9.35582226120295936	-5.9546	-5.9546	8.00091857717710976	8.4329	8.4329	3.33053669683088	-0.8509	-0.8509	2.59771487967431008	right	Vilja_right
320	Horse24	rCrH	HuntC	8.7846	8.7846	4.04908632267625024	-0.3368	-0.3368	4.56649442534147968	9.8583	9.8583	2.17419464128232	-1.6540	-1.6540	1.61724533041207008	right	Vilja_right
321	Horse24	rCrRL	Correct_Diagonal	6.9102	6.9102	5.54944200823114048	-4.9035	-4.9035	4.95061437815267968	4.5857	4.5857	2.03225854289892992	2.9024	2.9024	2.03559910758411008	right	Vilja_right
322	Horse24	rCrRR	Wrong_Diagonal	18.7056	18.7056	6.40081806261309952	-9.3510	-9.3510	6.59508589257737984	12.1172	12.1172	2.31483880450343968	-0.9387	-0.9387	1.98135565904648	right	Vilja_right
323	Horse24	rSS	Sitting	4.4196	4.4196	4.63364928948985984	-12.4386	-12.4386	7.72873442216136064	3.1348	3.1348	2.60487919170441984	-0.4227	-0.4227	2.35102794861160992	nolead	Vilja_nolead
324	Horse24	rSH	Hunt	2.9402	2.9402	2.83199062572712992	-1.0703	-1.0703	5.83594435124120064	4.5513	4.5513	2.70668810540363008	-1.3451	-1.3451	2.57075712479009984	nolead	Vilja_nolead
325	Horse24	rSRL	Rising	-4.0968	4.0968	5.40961496532768064	7.9577	-7.9577	5.50441864699425024	-1.3900	1.3900	3.13086110764461952	-2.3570	2.3570	1.4622463216654	nolead	Vilja_nolead
326	Horse24	rSRR	Rising	11.4461	11.4461	5.8589954623990592	-10.4992	-10.4992	5.47343347861009984	8.9282	8.9282	2.42626304037433024	-3.4820	-3.4820	1.87818831793323008	nolead	Vilja_nolead
327	Horse24	uS	Unridden	2.1077	2.1077	4.5481230560696896	2.4568	2.4568	5.56758399214322944	3.6516	3.6516	3.43284109621620032	1.4080	1.4080	2.72608540143199008	nolead	Vilja_nolead
328	Horse25	uCl	UnriddenC	5.9339	-5.9339	3.08706008224556992	-3.6113	3.6113	6.06720883851974912	3.7746	-3.7746	2.28745243377248032	1.9028	-1.9028	1.81892701894291008	left	Volfram_left
329	Horse25	uCr	UnriddenC	2.8329	2.8329	4.37042098284832	20.2822	20.2822	7.16376212109814016	-0.2568	-0.2568	2.30639729113639008	-2.0001	-2.0001	2.34713064014241024	right	Volfram_right
330	Horse25	uS	Unridden	2.3100	2.3100	4.56356832475218944	16.3494	16.3494	7.5282262046078592	-3.2394	-3.2394	2.20962432056234976	-3.0232	-3.0232	2.50512702050984	nolead	Volfram_nolead
331	Horse25	rClRR	Correct_Diagonal	6.8095	-6.8095	8.18569317358614016	-7.8690	7.8690	5.65339500825491008	0.5001	-0.5001	2.31630512849705984	8.9609	-8.9609	2.34781902607560992	left	Volfram_left
332	Horse25	rClRL	Wrong_Diagonal	16.4703	-16.4703	5.7164735865001504	-11.8496	11.8496	4.18788103414483008	3.8428	-3.8428	1.68657456428907008	2.7408	-2.7408	1.99012533592780992	left	Volfram_left
333	Horse25	rClS	SittingC	15.9636	-15.9636	9.48834654856963968	-8.1474	8.1474	6.16734974854342016	2.0865	-2.0865	2.552222000444	6.6184	-6.6184	2.37677654973784992	left	Volfram_left
334	Horse25	rClH	HuntC	6.0911	-6.0911	3.5274738625771296	-6.4924	6.4924	4.9022250834360096	3.0145	-3.0145	2.44932397829306976	2.8572	-2.8572	2.45829548448824	left	Volfram_left
335	Horse25	rCrRL	Correct_Diagonal	2.5962	2.5962	6.52201699601761024	12.3727	12.3727	6.43402738004766976	-4.9983	-4.9983	2.23734641606024992	-1.0096	-1.0096	2.79363372908002016	right	Volfram_right
336	Horse25	rCrRR	Wrong_Diagonal	2.6394	2.6394	5.62017957945193984	10.4555	10.4555	4.76216955231653056	-0.8886	-0.8886	2.18741313694021024	-7.9798	-7.9798	2.18430754653372	right	Volfram_right
337	Horse25	rCrS	SittingC	3.1721	3.1721	8.20495907208857088	8.0245	8.0245	7.2854896415863296	-3.4138	-3.4138	2.09882040115431008	-5.7211	-5.7211	2.67243606358522016	right	Volfram_right
338	Horse25	rCrH	HuntC	4.2349	4.2349	3.94629177010068992	14.4095	14.4095	6.46744345442659968	-1.7606	-1.7606	2.15232059191162016	-4.8372	-4.8372	2.68384595622005984	right	Volfram_right
339	Horse25	rSRL	Rising	3.6693	-3.6693	5.23712403426899008	-15.8284	15.8284	5.9402482736333696	4.3203	-4.3203	1.29206874546148016	1.3804	-1.3804	1.71486865983600992	nolead	Volfram_nolead
340	Horse25	rSRR	Rising	-2.8738	-2.8738	3.82793244553380032	8.0355	8.0355	6.09631115137232	-0.8941	-0.8941	1.8123661968804	-7.0543	-7.0543	1.55772972140279008	nolead	Volfram_nolead
341	Horse25	rSS	Sitting	-2.1143	-2.1143	3.01263029285401984	10.3977	10.3977	3.06983802798395968	-3.8882	-3.8882	1.78257281485219008	-4.4380	-4.4380	2.10863739804428	nolead	Volfram_nolead
342	Horse25	rSH	Hunt	0.9015	0.9015	3.27982779198980032	10.4075	10.4075	7.28955857060956032	-3.1206	-3.1206	1.78808279826920992	-2.2450	-2.2450	2.06994713048286016	nolead	Volfram_nolead
343	Horse26	rCrS	SittingC	9.6709	9.6709	5.81271728246790016	-1.7329	-1.7329	7.76779884568316032	4.5547	4.5547	2.68196244942555968	-5.5834	-5.5834	2.65735299878478016	right	Wanbori_right
344	Horse26	rCrH	HuntC	8.3340	8.3340	3.32026613564985984	-15.9702	-15.9702	7.48209007630587008	5.6056	5.6056	2.82723900862009984	-5.8996	-5.8996	2.13522163532294016	right	Wanbori_right
345	Horse26	rCrRL	Correct_Diagonal	9.0368	9.0368	5.42224175139675008	-0.2625	-0.2625	9.0258387712460096	2.5527	2.5527	2.23612636090307008	0.4134	0.4134	2.16657631151342016	right	Wanbori_right
346	Horse26	rCrRR	Wrong_Diagonal	19.3313	19.3313	6.35703862196561024	-10.0709	-10.0709	6.28617582431165952	7.3121	7.3121	2.49859768346192	-7.8071	-7.8071	2.46545337913064	right	Wanbori_right
347	Horse26	rClS	SittingC	5.0225	-5.0225	7.87817062802977024	-1.9484	1.9484	7.28658735068770944	1.5848	-1.5848	3.10834914633859008	-1.5536	1.5536	4.23948970383321984	left	Wanbori_left
348	Horse26	rClH	HuntC	14.2742	-14.2742	5.53493001523574016	-5.6709	5.6709	7.46488271484847104	0.6469	-0.6469	3.20997116033875008	-7.0874	7.0874	2.25481934204024	left	Wanbori_left
349	Horse26	rClRR	Correct_Diagonal	0.9790	-0.9790	5.35077559629387968	3.2260	-3.2260	5.41714224100241984	-1.6950	1.6950	2.09521916431359968	1.6595	-1.6595	2.35023415468933984	left	Wanbori_left
350	Horse26	rClRL	Wrong_Diagonal	15.2552	-15.2552	6.1793585141823296	-6.0756	6.0756	5.41627679289328	3.9409	-3.9409	2.31017671170963008	-6.4590	6.4590	2.11855682155953984	left	Wanbori_left
351	Horse26	rSS	Sitting	1.1146	1.1146	3.9377020171296	-1.0972	-1.0972	7.96453005948387072	0.6681	0.6681	3.96388988138136	-1.7211	-1.7211	2.63132112111871008	nolead	Wanbori_nolead
352	Horse26	rSH	Hunt	1.0463	1.0463	3.7662067495303104	-9.3282	-9.3282	4.43208442655171968	2.8237	2.8237	3.47520780416673984	0.6586	0.6586	2.69138555513604992	nolead	Wanbori_nolead
353	Horse26	rSRR	Rising	5.4029	5.4029	3.87494976212403968	-12.6512	-12.6512	8.00557573515813888	4.2402	4.2402	2.32458585522480992	-4.0982	-4.0982	1.88751483560316	nolead	Wanbori_nolead
354	Horse26	rSRL	Rising	-0.8500	0.8500	3.94992120936204992	0.8672	-0.8672	6.86554255833095936	0.5376	-0.5376	2.75182562847898016	-5.0540	5.0540	2.03437749223848	nolead	Wanbori_nolead
355	Horse26	uCr	UnriddenC	4.4610	4.4610	3.59848135215825984	-10.5964	-10.5964	6.58552549943825024	2.4570	2.4570	2.92447951323272	-7.7293	-7.7293	2.19382088223201984	right	Wanbori_right
356	Horse26	uCl	UnriddenC	4.4043	-4.4043	4.8862999145970304	-4.3594	4.3594	6.4953069741301696	-1.1566	1.1566	3.99146624440236992	-7.6110	7.6110	2.79476705697411008	left	Wanbori_left
357	Horse26	uS	Unridden	-0.5445	-0.5445	3.22210815337678976	-10.7291	-10.7291	6.58402280333808	1.9444	1.9444	2.16448923503106016	-0.0863	-0.0863	3.28456308134081024	nolead	Wanbori_nolead
358	Horse23	rCrRL	Correct_Diagonal	5.0957	5.0957	4.60534534523985984	4.2063	4.2063	4.25160545434261056	-3.1768	-3.1768	2.01323609276481024	4.7940	4.7940	1.92800313238768	right	Zonette_right
359	Horse23	rCrRR	Wrong_Diagonal	11.1636	11.1636	4.28720776334627968	-10.1976	-10.1976	4.3367201702360704	0.6578	0.6578	2.67712099440720992	-2.3527	-2.3527	1.65074968831161984	right	Zonette_right
360	Horse23	rCrH	HuntC	3.0670	3.0670	4.63370581936662016	3.6286	3.6286	4.57578386581435008	-0.9746	-0.9746	1.83941384700713984	1.1883	1.1883	2.29636383913733984	right	Zonette_right
361	Horse23	rCrS	SittingC	5.4005	5.4005	5.76024912315324928	-2.2608	-2.2608	4.693274283003392	-0.5849	-0.5849	2.56987901340856864	1.6254	1.6254	2.15802959819190432	right	Zonette_right
362	Horse23	rClRR	Correct_Diagonal	-2.3744	2.3744	5.36153366579129984	4.5669	-4.5669	5.93141862813811968	9.4089	-9.4089	2.83470906236702016	1.8335	-1.8335	2.59249230549625984	left	Zonette_left
363	Horse23	rClRL	Wrong_Diagonal	6.3368	-6.3368	4.95061388140218048	-10.0876	10.0876	6.09896439033073024	9.8898	-9.8898	2.41187422870275008	-5.0888	5.0888	1.94018709281364992	left	Zonette_left
364	Horse23	rClS	SittingC	4.9448	-4.9448	6.68937029541085952	-2.6635	2.6635	8.79750020050048	10.2809	-10.2809	3.05552681989952	-1.0603	1.0603	2.71148262054169984	left	Zonette_left
365	Horse23	rClH	HuntC	-2.1206	2.1206	3.51040063875334016	0.7100	-0.7100	3.57882386724940992	9.6737	-9.6737	1.84129977646263008	-2.1962	2.1962	2.02616938990842016	left	Zonette_left
366	Horse23	rSRR	Rising	2.3273	2.3273	4.7806425100320896	-2.6565	-2.6565	9.22874706561753984	-4.7731	-4.7731	2.61009798519015008	-2.2538	-2.2538	2.56097384191720992	nolead	Zonette_nolead
367	Horse23	rSRL	Rising	-2.8380	2.8380	5.60904743066217024	-6.7308	6.7308	6.70354260905885056	6.7518	-6.7518	2.27325830105103008	-6.2724	6.2724	1.73886245615676	nolead	Zonette_nolead
368	Horse23	rSS	Sitting	1.2444	1.2444	4.0568821878593696	4.2366	4.2366	9.05248715697436032	-5.1564	-5.1564	3.18658953165648	2.8644	2.8644	2.65389275158878016	nolead	Zonette_nolead
369	Horse23	rSH	Hunt	3.7063	3.7063	3.10999642454728	-1.9726	-1.9726	4.4693790463848704	-5.4200	-5.4200	2.32393565846584	3.0645	3.0645	1.59981757123433024	nolead	Zonette_nolead
370	Horse23	uCr	UnriddenC	1.2015	1.2015	2.77899976194999008	0.5629	0.5629	3.79291159369417024	-1.3514	-1.3514	1.78194022480937024	1.3237	1.3237	2.09477992435465024	right	Zonette_right
371	Horse23	uCl	UnriddenC	-4.3913	4.3913	4.03753039750962048	5.3777	-5.3777	5.02270956224702016	8.7950	-8.7950	2.39282811024843008	-1.6141	1.6141	2.22207430491311008	left	Zonette_left
372	Horse23	uS	Unridden	0.6443	0.6443	2.67311080707756032	-3.8103	-3.8103	4.40352066024465024	-4.2748	-4.2748	3.25812282019489024	1.4413	1.4413	2.52006256907549984	nolead	Zonette_nolead
373	Horse12	uS	Unridden	6.1037	6.1037	10.4427022782086992	-1.9268	-1.9268	11.7352993421741008	1.8075	1.8075	2.54912982029872992	1.9671	1.9671	3.40726685303379008	nolead	hard_day`s_night_nolead
374	Horse12	uCl	UnriddenC	-8.8635	8.8635	6.65186740252481024	-1.0616	1.0616	7.8808408460823808	1.3633	-1.3633	2.18802646982461024	-3.1350	3.1350	1.99955142090756992	left	hard_day`s_night_left
375	Horse12	uCr	UnriddenC	-1.9765	-1.9765	4.41432097324534016	-2.6091	-2.6091	4.83586511507077952	7.4635	7.4635	1.84478198861864	1.1407	1.1407	3.61084042148428992	right	hard_day`s_night_right
376	Horse12	rSH	Hunt	-0.5706	-0.5706	8.31300993239148032	-3.2484	-3.2484	15.2648938972072992	1.8613	1.8613	2.96056416951822976	0.0975	0.0975	2.34222504539390016	nolead	hard_day`s_night_nolead
377	Horse12	rSS	Sitting	7.9967	7.9967	6.4118517861199296	-2.5291	-2.5291	5.70794200798461056	4.2642	4.2642	3.21546640692035968	4.2140	4.2140	3.27992672695129024	nolead	hard_day`s_night_nolead
378	Horse12	rSRL	Rising	3.2959	-3.2959	12.1171669556072992	3.7543	-3.7543	7.69948804968818048	-1.6166	1.6166	2.89265009735726976	-6.2378	6.2378	3.13226409604472	nolead	hard_day`s_night_nolead
379	Horse12	rSRR	Rising	5.0594	5.0594	6.1200333735712896	-1.9896	-1.9896	8.95500909093298048	6.3747	6.3747	2.92883372009201984	-3.5443	-3.5443	3.14736730550307008	nolead	hard_day`s_night_nolead
380	Horse12	rClH	HuntC	5.6727	-5.6727	9.24392326973652864	-0.3622	0.3622	6.86124282103743872	4.8440	-4.8440	2.1956247599479936	-2.4020	2.4020	3.8791558998384576	left	hard_day`s_night_left
381	Horse12	rClS	SittingC	3.0026	-3.0026	8.9720056768306496	1.2198	-1.2198	6.86536782885268992	2.5961	-2.5961	3.01125859942193024	-1.1148	1.1148	2.85527931316689984	left	hard_day`s_night_left
382	Horse12	rClRR	Correct_Diagonal	3.4817	-3.4817	6.71260408410302976	-1.1154	1.1154	6.45328092687257984	-0.6201	0.6201	2.71258959142312992	2.3880	-2.3880	2.24845328197095008	left	hard_day`s_night_left
383	Horse12	rClRL	Wrong_Diagonal	10.0716	-10.0716	5.47391138441454016	-8.5696	8.5696	7.17278497772642944	3.3361	-3.3361	2.66814807570152992	-3.8139	3.8139	3.30832133312290048	left	hard_day`s_night_left
384	Horse12	rCrH	HuntC	8.3483	8.3483	8.11012034706659968	0.0252	0.0252	6.61144667476146048	8.9309	8.9309	2.36605496666160032	0.2649	0.2649	2.89317758670118976	right	hard_day`s_night_right
385	Horse12	rCrS	SittingC	12.8861	12.8861	10.9121755439207008	-1.9647	-1.9647	9.46323836462503936	9.4531	9.4531	3.95100459079892032	2.8364	2.8364	3.39082294102060032	right	hard_day`s_night_right
386	Horse12	rCrRL	Correct_Diagonal	12.4896	12.4896	10.4026823533074	-4.3135	-4.3135	9.5913838236535488	5.0485	5.0485	4.82829032916227008	6.8946	6.8946	3.78233260262537984	right	hard_day`s_night_right
387	Horse12	rCrRR	Wrong_Diagonal	12.3690	12.3690	8.7345387751353088	-5.2810	-5.2810	8.23839683062625024	9.0930	9.0930	2.55212066933375008	-2.1363	-2.1363	3.48919774054121024	right	hard_day`s_night_right

## Sheet: HDmin_asymmetric
Horse	Condition1	Condition3	sqFore_Diff_Min_Mean33	Fore_Diff_Min_Mean33	Fore_Diff_Min_Mean3	Fore_Diff_Min_Mean1	Fore_Diff_Min_SD
Horse7	rSRR	straight_sitting_lame_limb	1631.36	40.3901	11.3901	11.3901	6.94461058553910016
Horse7	rSRL	straight_sitting_sound_limb	942.52	30.7005	1.7005	1.7005	8.41794607902616064
Horse7	rSH	rSH	1420.21	37.6857	8.6857	8.6857	2.74623600490454016
Horse7	rCrRL	circle_inside_sitting_sound_limb	1003.18	31.6730	2.6730	2.6730	6.50069088375575936
Horse7	rCrRR	circle_inside_sitting_lame_limb	1356.60	36.8320	7.8320	7.8320	7.04906928113873024
Horse7	rCrH	circle_inside_hunt	1375.54	37.0883	8.0883	8.0883	6.32554598004024064
Horse7	rCrS	circle_inside_sitting	1110.55	33.3248	4.3248	4.3248	7.25052312878226944
Horse7	rClRR	circle_outside_sitting_lame_limb	1428.50	37.7955	8.7955	8.7955	7.79906967241585024
Horse7	rClRL	circle_outside_sitting_sound_limb	738.64	27.1779	-1.8221	-1.8221	8.20993613739155968
Horse7	rClH	circle_outside_hunt	1442.68	37.9827	8.9827	8.9827	4.38618077892675968
Horse7	rClS	circle_outside_sitting	1218.18	34.9025	5.9025	5.9025	8.18953409636496896
Horse7	rSS	rSS	1326.16	36.4165	7.4165	7.4165	6.1158728276539392
Horse7	uS	uS	1542.04	39.2688	10.2688	10.2688	3.06532607345633984
Horse7	uCr	unridden_lame_inside	1244.13	35.2723	6.2723	6.2723	3.77671314601846016
Horse7	uCl	unridden_lame_outside	1788.99	42.2964	13.2964	13.2964	3.86291068191649984
Horse15	uCr	unridden_lame_inside	1163.36	34.1081	5.1081	5.1081	4.36483358942641984
Horse15	uS	uS	1548.60	39.3523	10.3523	10.3523	6.14219801918360064
Horse15	rClS	circle_outside_sitting	218.33	14.7762	-14.2238	-14.2238	12.5335714695124992
Horse15	rClH	circle_outside_hunt	783.33	27.9881	-1.0119	-1.0119	5.78604670085907072
Horse15	rClRR	circle_outside_sitting_lame_limb	291.90	17.0851	-11.9149	-11.9149	9.7067536264905408
Horse15	rClRL	circle_outside_sitting_sound_limb	71.71	8.4683	-20.5317	-20.5317	7.05424282179884928
Horse15	rCrH	circle_inside_hunt	1952.77	44.1902	15.1902	15.1902	7.72516694994742016
Horse15	rCrS	circle_inside_sitting	1198.89	34.6251	5.6251	5.6251	8.38326931982388992
Horse15	rCrRL	circle_inside_sitting_sound_limb	1408.56	37.5308	8.5308	8.5308	9.60470335717329024
Horse15	rCrRR	circle_inside_sitting_lame_limb	2129.69	46.1486	17.1486	17.1486	9.4717876280824
Horse15	rSS	rSS	942.80	30.7051	1.7051	1.7051	8.06345027854911104
Horse15	rSH	rSH	913.02	30.2163	1.2163	1.2163	7.32670587395122944
Horse15	rSRR	straight_sitting_lame_limb	1046.96	32.3568	3.3568	3.3568	6.59657967406643968
Horse15	rSRL	straight_sitting_sound_limb	575.16	23.9825	-5.0175	-5.0175	6.06629743590893952
Horse15	uCl	unridden_lame_outside	831.82	28.8413	-0.1587	-0.1587	4.84926381229612928
Horse19	rSRR	straight_sitting_sound_limb	640.13	25.3007	-3.6993	3.6993	6.65929225013315072
Horse19	rSRL	straight_sitting_lame_limb	1086.52	32.9624	3.9624	-3.9624	5.28996718417528
Horse19	rSH	rSH	890.96	29.8489	0.8489	-0.8489	3.04748860224619968
Horse19	rSS	rSS	825.48	28.7311	-0.2689	0.2689	6.7512612657509696
Horse19	rCrRL	circle_outside_sitting_lame_limb	251.99	15.8743	-13.1257	13.1257	9.22974634385485952
Horse19	rCrRR	circle_outside_sitting_sound_limb	0.06	0.2395	-28.7605	28.7605	7.78374193917303936
Horse19	rCrH	circle_outside_hunt	269.02	16.4019	-12.5981	12.5981	4.9629361371842496
Horse19	rCrS	circle_outside_sitting	40.82	6.3890	-22.6110	22.6110	11.9706421622427008
Horse19	rClRR	circle_inside_sitting_sound_limb	1110.00	33.3167	4.3167	-4.3167	9.7904933733540608
Horse19	rClRL	circle_inside_sitting_lame_limb	2707.46	52.0332	23.0332	-23.0332	12.2755780402818
Horse19	rClH	circle_inside_hunt	1678.13	40.9650	11.9650	-11.9650	6.5096366918856704
Horse19	rClS	circle_inside_sitting	2050.82	45.2859	16.2859	-16.2859	9.78235885427731968
Horse19	uS	uS	1362.77	36.9157	7.9157	-7.9157	5.85672845112470016
Horse19	uCr	unridden_lame_outside	991.80	31.4929	2.4929	-2.4929	4.80942254660331968
Horse19	uCl	unridden_lame_inside	1361.13	36.8935	7.8935	-7.8935	3.4367381872816096
Horse20	uS	uS	1350.05	36.7431	7.7431	7.7431	4.56889074015020032
Horse20	uCr	unridden_lame_inside	1930.21	43.9341	14.9341	14.9341	4.34274910378972992
Horse20	uCl	unridden_lame_outside	1257.80	35.4655	6.4655	6.4655	3.30733842593165952
Horse20	rSH	rSH	1637.62	40.4675	11.4675	11.4675	5.4620831000223904
Horse20	rSS	rSS	1095.93	33.1048	4.1048	4.1048	4.64482389982306048
Horse20	rSRR	straight_sitting_lame_limb	1395.62	37.3580	8.3580	8.3580	3.60314923791451008
Horse20	rSRL	straight_sitting_sound_limb	931.95	30.5278	1.5278	1.5278	3.37593656481582016
Horse20	rCrH	circle_inside_hunt	2669.73	51.6695	22.6695	22.6695	4.3695014706096096
Horse20	rCrS	circle_inside_sitting	2215.21	47.0660	18.0660	18.0660	6.63058011034734976
Horse20	rCrRL	circle_inside_sitting_sound_limb	1450.91	38.0908	9.0908	9.0908	5.56833689174500992
Horse20	rCrRR	circle_inside_sitting_lame_limb	2603.09	51.0204	22.0204	22.0204	7.30883652869745024
Horse20	rClH	circle_outside_hunt	1153.44	33.9624	4.9624	4.9624	4.37886551238037056
Horse20	rClS	circle_outside_sitting	517.03	22.7383	-6.2617	-6.2617	8.22139705054846976
Horse20	rClRR	circle_outside_sitting_lame_limb	1060.52	32.5656	3.5656	3.5656	7.7049426580424896
Horse20	rClRL	circle_outside_sitting_sound_limb	318.96	17.8596	-11.1404	-11.1404	9.89051266040084096
Horse21	uCl	unridden_lame_outside	1355.75	36.8205	7.8205	7.8205	5.8241960509648
Horse21	uCr	unridden_lame_inside	761.37	27.5929	-1.4071	-1.4071	4.00290067650083904
Horse21	uS	uS	1427.17	37.7779	8.7779	8.7779	5.06246369037867008
Horse21	rClRR	circle_outside_sitting_lame_limb	701.29	26.4819	-2.5181	-2.5181	7.55118062727174016
Horse21	rClRL	circle_outside_sitting_sound_limb	163.41	12.7833	-16.2167	-16.2167	5.5361833748148896
Horse21	rClS	circle_outside_sitting	443.01	21.0478	-7.9522	-7.9522	5.8720696111384704
Horse21	rClH	circle_outside_hunt	1270.55	35.6448	6.6448	6.6448	5.75066004525486976
Horse21	rCrRL	circle_inside_sitting_sound_limb	1290.97	35.9301	6.9301	6.9301	6.02410691251218944
Horse21	rCrRR	circle_inside_sitting_lame_limb	1433.96	37.8676	8.8676	8.8676	6.4546025335976192
Horse21	rCrS	circle_inside_sitting	1135.89	33.7029	4.7029	4.7029	8.44736304398500992
Horse21	rCrH	circle_inside_hunt	1127.27	33.5749	4.5749	4.5749	5.08968290945921024
Horse21	rSRL	straight_sitting_sound_limb	733.25	27.0786	-1.9214	-1.9214	2.91128954245489984
Horse21	rSRR	straight_sitting_lame_limb	1023.38	31.9903	2.9903	2.9903	4.27867187996432
Horse21	rSS	rSS	795.81	28.2100	-0.7900	-0.7900	5.56540045405370944
Horse21	rSH	rSH	1173.65	34.2585	5.2585	5.2585	3.99199496802702016
Horse12	uS	uS	1232.27	35.1037	6.1037	6.1037	10.4427022782086992
Horse12	uCl	unridden_lame_outside	1433.64	37.8635	8.8635	8.8635	6.65186740252481024
Horse12	uCr	unridden_lame_inside	730.27	27.0235	-1.9765	-1.9765	4.41432097324534016
Horse12	rSH	rSH	808.23	28.4294	-0.5706	-0.5706	8.31300993239148032
Horse12	rSS	rSS	1368.76	36.9967	7.9967	7.9967	6.4118517861199296
Horse12	rSRL	straight_sitting_sound_limb	660.70	25.7041	-3.2959	-3.2959	12.1171669556072992
Horse12	rSRR	straight_sitting_lame_limb	1160.05	34.0594	5.0594	5.0594	6.1200333735712896
Horse12	rClH	circle_outside_hunt	544.16	23.3273	-5.6727	-5.6727	9.24392326973652864
Horse12	rClS	circle_outside_sitting	675.86	25.9974	-3.0026	-3.0026	8.9720056768306496
Horse12	rClRR	circle_outside_sitting_lame_limb	651.18	25.5183	-3.4817	-3.4817	6.71260408410302976
Horse12	rClRL	circle_outside_sitting_sound_limb	358.28	18.9284	-10.0716	-10.0716	5.47391138441454016
Horse12	rCrH	circle_inside_hunt	1394.90	37.3483	8.3483	8.3483	8.11012034706659968
Horse12	rCrS	circle_inside_sitting	1754.44	41.8861	12.8861	12.8861	10.9121755439207008
Horse12	rCrRL	circle_inside_sitting_sound_limb	1721.39	41.4896	12.4896	12.4896	10.4026823533074
Horse12	rCrRR	circle_inside_sitting_lame_limb	1711.39	41.3690	12.3690	12.3690	8.7345387751353088

## Sheet: HDmax_asymmetric
Horse	Condition1	Condition3	Fore_Diff_Max_Mean3	Fore_Diff_Max_Mean1	Fore_Diff_Max_SD
Horse2	rClRR	circle_outside_sitting_lame_limb	5.9580	5.9580	8.29264941051435904
Horse2	rClRL	circle_outside_sitting_sound_limb	19.7931	19.7931	8.75780063968283904
Horse2	rClS	circle_outside_sitting	12.0713	12.0713	7.4426929990139904
Horse2	rClH	circle_outside_hunt	6.3998	6.3998	3.88996809181678016
Horse2	rCrRL	circle_inside_sitting_sound_limb	1.8569	1.8569	10.7371793892120016
Horse2	rCrRR	circle_inside_sitting_lame_limb	1.8867	1.8867	8.62290016201228928
Horse2	rCrS	circle_inside_sitting	2.1991	2.1991	10.7659702321885008
Horse2	rCrH	circle_inside_hunt	4.4894	4.4894	4.5757239212529696
Horse2	rSRL	straight_sitting_sound_limb	10.9534	10.9534	8.34060924719057024
Horse2	rSRR	straight_sitting_lame_limb	2.2116	2.2116	5.68684060497148032
Horse2	rSS	rSS	4.7233	4.7233	5.89519263632779008
Horse2	rSH	rSH	4.9711	4.9711	5.03327714359510016
Horse2	uCl	unridden_lame_outside	2.1900	2.1900	3.3834424845741504
Horse2	uCr	unridden_lame_inside	11.5910	11.5910	3.3454357218317504
Horse2	uS	uS	8.3178	8.3178	6.29439894228466048
Horse5	rCrH	circle_inside_hunt	1.5949	1.5949	4.84998123324689984
Horse5	rCrRL	circle_inside_sitting_sound_limb	4.1182	4.1182	13.2761407272976
Horse5	rCrRR	circle_inside_sitting_lame_limb	-17.3978	-17.3978	12.4501891358304
Horse5	rClH	circle_outside_hunt	-4.3333	-4.3333	5.75738336772144
Horse5	rClRR	circle_outside_sitting_lame_limb	-10.0371	-10.0371	9.8279537366544704
Horse5	rClRL	circle_outside_sitting_sound_limb	-1.7942	-1.7942	14.3851146623135008
Horse5	rSRR	straight_sitting_lame_limb	-6.0348	-6.0348	12.7501196924633008
Horse5	rSRL	straight_sitting_sound_limb	5.2455	5.2455	13.2558095552702
Horse5	rSS	rSS	2.1081	2.1081	17.5885755333267008
Horse5	rSH	rSH	4.8510	4.8510	12.410749242616
Horse5	uCr	unridden_lame_inside	1.9596	1.9596	5.43911317814854976
Horse5	uCl	unridden_lame_outside	4.1664	4.1664	11.227730569166
Horse5	uS	uS	6.2113	6.2113	6.16762309176598016
Horse8	uCr	unridden_lame_inside	11.1316	11.1316	5.79028878219571968
Horse8	uCl	unridden_lame_outside	-3.2113	-3.2113	6.32205699141934976
Horse8	rSH	rSH	5.3289	5.3289	8.00304400597769088
Horse8	rSS	rSS	7.5570	7.5570	6.85680448082572928
Horse8	rSRR	straight_sitting_lame_limb	0.9443	0.9443	7.08004614137112064
Horse8	rSRL	straight_sitting_sound_limb	8.7734	8.7734	6.63144369863104
Horse8	rCrS	circle_inside_sitting	-1.4399	-1.4399	10.3001096789080016
Horse8	rCrH	circle_inside_hunt	-0.9001	-0.9001	9.33306698339795968
Horse8	rCrRL	circle_inside_sitting_sound_limb	0.7136	0.7136	7.01888886467517056
Horse8	rCrRR	circle_inside_sitting_lame_limb	-5.0460	-5.0460	7.98318192966171008
Horse8	rClH	circle_outside_hunt	2.3213	2.3213	12.5286868532756
Horse8	rClS	circle_outside_sitting	6.3113	6.3113	10.1086878909048
Horse8	rClRR	circle_outside_sitting_lame_limb	4.6559	4.6559	7.91735930123886976
Horse8	rClRL	circle_outside_sitting_sound_limb	7.3506	7.3506	6.53944211565394048
Horse8	uS	uS	8.1680	8.1680	10.3646260805615008
Horse10	uS	uS	9.2082	-9.2082	8.4401083167343104
Horse10	uCl	unridden_lame_inside	1.7128	-1.7128	7.43824031115616
Horse10	uCr	unridden_lame_outside	10.5072	-10.5072	4.55102505944990016
Horse10	rSRL	straight_sitting_lame_limb	-8.6276	8.6276	13.4368059279464016
Horse10	rSRR	straight_sitting_sound_limb	15.9427	-15.9427	13.0121810272532992
Horse10	rSH	rSH	1.8925	-1.8925	6.02705553533042944
Horse10	rSS	rSS	6.3824	-6.3824	12.8671697259038
Horse10	rClRR	circle_inside_sitting_sound_limb	-2.8890	2.8890	12.4786277421159008
Horse10	rClRL	circle_inside_sitting_lame_limb	-15.6448	15.6448	7.71608604932048
Horse10	rClH	circle_inside_hunt	1.7149	-1.7149	6.9464333998500096
Horse10	rClS	circle_inside_sitting	-7.8520	7.8520	13.2445950908124
Horse10	rCrH	circle_outside_hunt	5.5900	-5.5900	9.44092552245673088
Horse10	rCrRL	circle_outside_sitting_lame_limb	12.6421	-12.6421	11.074045497522
Horse10	rCrRR	circle_outside_sitting_sound_limb	15.2483	-15.2483	9.64737307397238016
Horse10	rCrS	circle_outside_sitting	19.2815	-19.2815	13.3746560503191984
Horse15	uCr	unridden_lame_outside	1.9345	-1.9345	7.65038114917636992
Horse15	uS	uS	8.0859	-8.0859	7.15686325686667008
Horse15	rClS	circle_inside_sitting	13.8863	-13.8863	9.5517466186227904
Horse15	rClH	circle_inside_hunt	10.6549	-10.6549	8.8727216906211008
Horse15	rClRR	circle_inside_sitting_sound_limb	10.6773	-10.6773	8.79037725418816
Horse15	rClRL	circle_inside_sitting_lame_limb	6.9561	-6.9561	6.86307716016036992
Horse15	rCrH	circle_outside_hunt	9.7525	-9.7525	7.15362259911273984
Horse15	rCrS	circle_outside_sitting	15.2198	-15.2198	7.42777921040125056
Horse15	rCrRL	circle_outside_sitting_lame_limb	12.7975	-12.7975	10.3096876075282016
Horse15	rCrRR	circle_outside_sitting_sound_limb	16.1702	-16.1702	8.06569196671316864
Horse15	rSS	rSS	13.4129	-13.4129	12.7529278306882
Horse15	rSH	rSH	-5.1027	5.1027	12.5339649239776992
Horse15	rSRR	straight_sitting_sound_limb	14.3980	-14.3980	7.74139645263356928
Horse15	rSRL	straight_sitting_lame_limb	9.9605	-9.9605	5.52664049426398016
Horse15	uCl	unridden_lame_inside	2.8375	-2.8375	6.27916520625888
Horse21	uCl	unridden_lame_outside	8.1311	8.1311	6.84330547811230976
Horse21	uCr	unridden_lame_inside	-7.5756	-7.5756	7.20359637682438912
Horse21	uS	uS	9.3086	9.3086	9.89235075877255936
Horse21	rClRR	circle_outside_sitting_lame_limb	0.9952	0.9952	9.00096514759865088
Horse21	rClRL	circle_outside_sitting_sound_limb	8.2466	8.2466	6.79285751016188032
Horse21	rClS	circle_outside_sitting	-0.1504	-0.1504	6.50317640726621056
Horse21	rClH	circle_outside_hunt	1.1980	1.1980	8.69157834053270016
Horse21	rCrRL	circle_inside_sitting_sound_limb	1.2959	1.2959	5.81102849874701952
Horse21	rCrRR	circle_inside_sitting_lame_limb	-11.2013	-11.2013	7.85278105685053952
Horse21	rCrS	circle_inside_sitting	-2.0710	-2.0710	8.66721870483537024
Horse21	rCrH	circle_inside_hunt	-0.7995	-0.7995	9.17900254545820032
Horse21	rSRL	straight_sitting_sound_limb	7.5371	7.5371	7.21610703826439936
Horse21	rSRR	straight_sitting_lame_limb	-4.3063	-4.3063	5.03058663261261952
Horse21	rSS	rSS	-2.4365	-2.4365	8.64471130297116032
Horse21	rSH	rSH	4.0776	4.0776	4.7129711626253696
Horse25	uCl	unridden_lame_outside	3.6113	3.6113	6.06720883851974912
Horse25	uCr	unridden_lame_inside	20.2822	20.2822	7.16376212109814016
Horse25	uS	uS	16.3494	16.3494	7.5282262046078592
Horse25	rClRR	circle_outside_sitting_lame_limb	7.8690	7.8690	5.65339500825491008
Horse25	rClRL	circle_outside_sitting_sound_limb	11.8496	11.8496	4.18788103414483008
Horse25	rClS	circle_outside_sitting	8.1474	8.1474	6.16734974854342016
Horse25	rClH	circle_outside_hunt	6.4924	6.4924	4.9022250834360096
Horse25	rCrRL	circle_inside_sitting_sound_limb	12.3727	12.3727	6.43402738004766976
Horse25	rCrRR	circle_inside_sitting_lame_limb	10.4555	10.4555	4.76216955231653056
Horse25	rCrS	circle_inside_sitting	8.0245	8.0245	7.2854896415863296
Horse25	rCrH	circle_inside_hunt	14.4095	14.4095	6.46744345442659968
Horse25	rSRL	straight_sitting_sound_limb	15.8284	15.8284	5.9402482736333696
Horse25	rSRR	straight_sitting_lame_limb	8.0355	8.0355	6.09631115137232
Horse25	rSS	rSS	10.3977	10.3977	3.06983802798395968
Horse25	rSH	rSH	10.4075	10.4075	7.28955857060956032
Horse26	rCrS	circle_outside_sitting	1.7329	-1.7329	7.76779884568316032
Horse26	rCrH	circle_outside_hunt	15.9702	-15.9702	7.48209007630587008
Horse26	rCrRL	circle_outside_sitting_lame_limb	0.2625	-0.2625	9.0258387712460096
Horse26	rCrRR	circle_outside_sitting_sound_limb	10.0709	-10.0709	6.28617582431165952
Horse26	rClS	circle_inside_sitting	-1.9484	1.9484	7.28658735068770944
Horse26	rClH	circle_inside_hunt	-5.6709	5.6709	7.46488271484847104
Horse26	rClRR	circle_inside_sitting_sound_limb	3.2260	-3.2260	5.41714224100241984
Horse26	rClRL	circle_inside_sitting_lame_limb	-6.0756	6.0756	5.41627679289328
Horse26	rSS	rSS	1.0972	-1.0972	7.96453005948387072
Horse26	rSH	rSH	9.3282	-9.3282	4.43208442655171968
Horse26	rSRR	straight_sitting_sound_limb	12.6512	-12.6512	8.00557573515813888
Horse26	rSRL	straight_sitting_lame_limb	0.8672	-0.8672	6.86554255833095936
Horse26	uCr	unridden_lame_outside	10.5964	-10.5964	6.58552549943825024
Horse26	uCl	unridden_lame_inside	-4.3594	4.3594	6.4953069741301696
Horse26	uS	uS	10.7291	-10.7291	6.58402280333808

## Sheet: PDmin_asymmetric
Horse	Condition1	Condition3	Hind_Diff_Min_Mean3	Hind_Diff_Min_Mean1	Hind_Diff_Min_SD
Horse8	uCr	unridden_lame_outside	-2.0072	2.0072	2.26421206511249024
Horse8	uCl	unridden_lame_inside	7.5003	-7.5003	2.24816418401000992
Horse8	rSH	rSH	4.7195	-4.7195	2.19751268288570016
Horse8	rSS	rSS	4.7651	-4.7651	2.27460738991437024
Horse8	rSRR	straight_sitting_lame_limb	1.5766	-1.5766	1.50484676701623008
Horse8	rSRL	straight_sitting_sound_limb	6.7977	-6.7977	1.92753994712856992
Horse8	rCrS	circle_outside_sitting	-1.3192	1.3192	1.94756863195268
Horse8	rCrH	circle_outside_hunt	-2.9138	2.9138	2.59152536933041024
Horse8	rCrRL	circle_outside_sitting_sound_limb	1.5762	-1.5762	2.16920757383065024
Horse8	rCrRR	circle_outside_sitting_lame_limb	-2.8459	2.8459	2.28739188757010016
Horse8	rClH	circle_inside_hunt	5.7368	-5.7368	2.4924233024584
Horse8	rClS	circle_inside_sitting	5.6336	-5.6336	2.21765760361875008
Horse8	rClRR	circle_inside_sitting_lame_limb	3.6665	-3.6665	2.12297256441116
Horse8	rClRL	circle_inside_sitting_sound_limb	8.1789	-8.1789	2.35004344218576
Horse8	uS	uS	4.4469	-4.4469	2.46796353140236992
Horse10	uS	uS	4.1069	4.1069	3.58330759788540992
Horse10	uCl	unridden_lame_outside	-3.0138	-3.0138	3.15531075499518976
Horse10	uCr	unridden_lame_inside	11.6968	11.6968	2.42679371796941024
Horse10	rSRL	straight_sitting_lame_limb	-2.4524	-2.4524	4.75319493325206016
Horse10	rSRR	straight_sitting_sound_limb	4.0333	4.0333	4.22240064018609984
Horse10	rSH	rSH	4.5830	4.5830	2.72335673244685024
Horse10	rSS	rSS	1.7585	1.7585	5.69722483242644032
Horse10	rClRR	circle_outside_sitting_sound_limb	-1.3883	-1.3883	3.17723962803958976
Horse10	rClRL	circle_outside_sitting_lame_limb	-1.6294	-1.6294	3.24732023343056
Horse10	rClH	circle_outside_hunt	-0.0555	-0.0555	3.13028504724312
Horse10	rClS	circle_outside_sitting	0.1749	0.1749	4.66756664166997056
Horse10	rCrH	circle_inside_hunt	11.4332	11.4332	3.33664181259550016
Horse10	rCrRL	circle_inside_sitting_lame_limb	5.8645	5.8645	3.67733506060702016
Horse10	rCrRR	circle_inside_sitting_sound_limb	6.7024	6.7024	3.50677432704953984
Horse10	rCrS	circle_inside_sitting	-1.2273	-1.2273	8.7320810170908096
Horse13	uS	uS	4.9067	-4.9067	2.08862569581919008
Horse13	uCr	unridden_lame_outside	2.8907	-2.8907	2.19990637352929984
Horse13	uCl	unridden_lame_inside	5.9996	-5.9996	2.31151693608819008
Horse13	rSRR	straight_sitting_lame_limb	4.5034	-4.5034	1.60755609019992
Horse13	rSRL	straight_sitting_sound_limb	6.5072	-6.5072	2.8367187637367056
Horse13	rSH	rSH	4.1603	-4.1603	2.16388566849392992
Horse13	rSS	rSS	4.6151	-4.6151	2.22096995072288032
Horse13	rCrRL	circle_outside_sitting_sound_limb	6.3233	-6.3233	2.66786267660519008
Horse13	rCrRR	circle_outside_sitting_lame_limb	3.4987	-3.4987	2.51950723833875968
Horse13	rCrS	circle_outside_sitting	2.8349	-2.8349	2.45484871480126016
Horse13	rCrH	circle_outside_hunt	0.2456	-0.2456	2.49288094107214016
Horse13	rClRR	circle_inside_sitting_lame_limb	2.0612	-2.0612	2.81149000964368
Horse13	rClRL	circle_inside_sitting_sound_limb	5.5278	-5.5278	2.47565199660168
Horse13	rClH	circle_inside_hunt	3.9969	-3.9969	3.12421592394577984
Horse13	rClS	circle_inside_sitting	2.9895	-2.9895	2.49453917750274016
Horse14	rCrS	circle_inside_sitting	7.1838	7.1838	1.74298140199755008
Horse14	rCrH	circle_inside_hunt	7.7558	7.7558	1.88315672212492992
Horse14	rCrRL	circle_inside_sitting_lame_limb	4.0171	4.0171	1.97619793485022016
Horse14	rCrRR	circle_inside_sitting_sound_limb	10.0357	10.0357	1.57985956607513984
Horse14	rClS	circle_outside_sitting	-0.3554	-0.3554	2.00650246017714016
Horse14	rClH	circle_outside_hunt	-0.7311	-0.7311	1.94441457740323008
Horse14	rClRR	circle_outside_sitting_sound_limb	2.2433	2.2433	2.10682406281184032
Horse14	rClRL	circle_outside_sitting_lame_limb	-2.6745	-2.6745	1.37888989102274
Horse14	rSS	rSS	4.0606	4.0606	1.80540695279774016
Horse14	rSH	rSH	2.5624	2.5624	1.87124554028348
Horse14	rSRR	straight_sitting_sound_limb	5.9819	5.9819	1.45186356403949984
Horse14	rSRL	straight_sitting_lame_limb	-0.0337	-0.0337	2.26578176268994016
Horse14	uCr	unridden_lame_inside	6.8514	6.8514	1.60590756102639008
Horse14	uCl	unridden_lame_outside	-0.3380	-0.3380	1.72458868867487008
Horse14	uS	uS	3.2551	3.2551	2.01773490956564992
Horse18	uCl	unridden_lame_outside	4.9712	4.9712	2.24673959744781024
Horse18	uCr	unridden_lame_inside	3.4043	3.4043	1.56986633138662976
Horse18	uS	uS	3.0725	3.0725	2.07360661769768
Horse18	rClS	circle_outside_sitting	6.1043	6.1043	2.12890585113078976
Horse18	rClH	circle_outside_hunt	3.9381	3.9381	2.54767786392081984
Horse18	rClRR	circle_outside_sitting_sound_limb	7.6320	7.6320	2.35488506965964032
Horse18	rClRL	circle_outside_sitting_lame_limb	3.6433	3.6433	2.38721079923430016
Horse18	rCrS	circle_inside_sitting	4.8156	4.8156	3.54138958036778048
Horse18	rCrH	circle_inside_hunt	3.6510	3.6510	2.23959000264617024
Horse18	rCrRL	circle_inside_sitting_lame_limb	1.8410	1.8410	2.58408301760586976
Horse18	rCrRR	circle_inside_sitting_sound_limb	5.6316	5.6316	2.49289066581464
Horse18	rSS	rSS	6.4107	6.4107	2.40776053195191008
Horse18	rSH	rSH	4.8220	4.8220	1.9318752600522
Horse18	rSRL	straight_sitting_lame_limb	4.2969	4.2969	3.14147182404523008
Horse18	rSRR	straight_sitting_sound_limb	8.0251	8.0251	2.38689831457928
Horse19	rSRR	straight_sitting_lame_limb	4.3360	-4.3360	2.24925836265339008
Horse19	rSRL	straight_sitting_sound_limb	6.6330	-6.6330	2.57501857725283968
Horse19	rSH	rSH	8.0956	-8.0956	2.70096145293311008
Horse19	rSS	rSS	4.6965	-4.6965	2.19802296643792992
Horse19	rCrRL	circle_outside_sitting_sound_limb	3.2358	-3.2358	2.59290494174853984
Horse19	rCrRR	circle_outside_sitting_lame_limb	-0.0878	0.0878	2.5269994542825072
Horse19	rCrH	circle_outside_hunt	2.3214	-2.3214	2.90000167880736
Horse19	rCrS	circle_outside_sitting	3.1938	-3.1938	2.51777318961525024
Horse19	rClRR	circle_inside_sitting_lame_limb	9.4784	-9.4784	2.7654614186796
Horse19	rClRL	circle_inside_sitting_sound_limb	11.5275	-11.5275	2.51573158857096992
Horse19	rClH	circle_inside_hunt	10.6590	-10.6590	2.15014583985173024
Horse19	rClS	circle_inside_sitting	11.0873	-11.0873	2.9520949420526496
Horse19	uS	uS	5.8721	-5.8721	2.45497636604799008
Horse19	uCr	unridden_lame_outside	3.7974	-3.7974	3.74849638188036032
Horse19	uCl	unridden_lame_inside	8.9054	-8.9054	2.91533283875627008
Horse20	uS	uS	3.2962	3.2962	2.03929023985784
Horse20	uCr	unridden_lame_inside	5.2148	5.2148	3.14483643107169024
Horse20	uCl	unridden_lame_outside	1.0894	1.0894	2.48815883279632992
Horse20	rSH	rSH	2.3396	2.3396	2.8489676867188
Horse20	rSS	rSS	5.0238	5.0238	2.04729180235145024
Horse20	rSRR	straight_sitting_sound_limb	5.2231	5.2231	2.82108571612769984
Horse20	rSRL	straight_sitting_lame_limb	2.4487	2.4487	1.99316262660622976
Horse20	rCrH	circle_inside_hunt	9.8301	9.8301	3.03989997944584
Horse20	rCrS	circle_inside_sitting	7.1969	7.1969	2.81989090434190016
Horse20	rCrRL	circle_inside_sitting_lame_limb	3.8825	3.8825	2.51872688180693024
Horse20	rCrRR	circle_inside_sitting_sound_limb	7.0732	7.0732	2.88950833476702976
Horse20	rClH	circle_outside_hunt	1.8457	1.8457	3.2184461075124096
Horse20	rClS	circle_outside_sitting	4.1115	4.1115	3.10793266540540992
Horse20	rClRR	circle_outside_sitting_sound_limb	3.7186	3.7186	2.47353375824472992
Horse20	rClRL	circle_outside_sitting_lame_limb	2.5222	2.5222	2.63180050317422016
Horse21	uCl	unridden_lame_outside	3.0067	3.0067	2.53244155995336992
Horse21	uCr	unridden_lame_inside	10.4662	10.4662	2.4618082392533216
Horse21	uS	uS	5.1404	5.1404	2.42969639833561024
Horse21	rClRR	circle_outside_sitting_sound_limb	4.4752	4.4752	3.08483882988526016
Horse21	rClRL	circle_outside_sitting_lame_limb	-1.4790	-1.4790	1.91403750314112
Horse21	rClS	circle_outside_sitting	1.6525	1.6525	2.91269520588689984
Horse21	rClH	circle_outside_hunt	0.2595	0.2595	2.26650831803766016
Horse21	rCrRL	circle_inside_sitting_lame_limb	8.1251	8.1251	2.65447800280711008
Horse21	rCrRR	circle_inside_sitting_sound_limb	13.5588	13.5588	1.90858681068624992
Horse21	rCrS	circle_inside_sitting	8.4494	8.4494	2.18324812073573024
Horse21	rCrH	circle_inside_hunt	10.7715	10.7715	1.73217498724786016
Horse21	rSRL	straight_sitting_lame_limb	3.9285	3.9285	2.26131719312008
Horse21	rSRR	straight_sitting_sound_limb	9.0377	9.0377	1.93561223084501024
Horse21	rSS	rSS	4.5449	4.5449	2.18324195628875008
Horse21	rSH	rSH	6.5870	6.5870	1.78855368677736
Horse24	uCl	unridden_lame_outside	-2.7354	-2.7354	2.55362120442504992
Horse24	uCr	unridden_lame_inside	11.6428	11.6428	2.42356428279089024
Horse24	rClS	circle_outside_sitting	-0.4674	-0.4674	2.48463475416712
Horse24	rClH	circle_outside_hunt	-3.4454	-3.4454	2.12728423615451008
Horse24	rClRR	circle_outside_sitting_sound_limb	2.6673	2.6673	2.11365085560117024
Horse24	rClRL	circle_outside_sitting_lame_limb	-4.3670	-4.3670	2.18152921942636
Horse24	rCrS	circle_inside_sitting	8.4329	8.4329	3.33053669683088
Horse24	rCrH	circle_inside_hunt	9.8583	9.8583	2.17419464128232
Horse24	rCrRL	circle_inside_sitting_lame_limb	4.5857	4.5857	2.03225854289892992
Horse24	rCrRR	circle_inside_sitting_sound_limb	12.1172	12.1172	2.31483880450343968
Horse24	rSS	rSS	3.1348	3.1348	2.60487919170441984
Horse24	rSH	rSH	4.5513	4.5513	2.70668810540363008
Horse24	rSRL	straight_sitting_lame_limb	1.3900	1.3900	3.13086110764461952
Horse24	rSRR	straight_sitting_sound_limb	8.9282	8.9282	2.42626304037433024
Horse24	uS	uS	3.6516	3.6516	3.43284109621620032
Horse25	uCl	unridden_lame_inside	3.7746	-3.7746	2.28745243377248032
Horse25	uCr	unridden_lame_outside	0.2568	-0.2568	2.30639729113639008
Horse25	uS	uS	3.2394	-3.2394	2.20962432056234976
Horse25	rClRR	circle_inside_sitting_lame_limb	0.5001	-0.5001	2.31630512849705984
Horse25	rClRL	circle_inside_sitting_sound_limb	3.8428	-3.8428	1.68657456428907008
Horse25	rClS	circle_inside_sitting	2.0865	-2.0865	2.552222000444
Horse25	rClH	circle_inside_hunt	3.0145	-3.0145	2.44932397829306976
Horse25	rCrRL	circle_outside_sitting_sound_limb	4.9983	-4.9983	2.23734641606024992
Horse25	rCrRR	circle_outside_sitting_lame_limb	0.8886	-0.8886	2.18741313694021024
Horse25	rCrS	circle_outside_sitting	3.4138	-3.4138	2.09882040115431008
Horse25	rCrH	circle_outside_hunt	1.7606	-1.7606	2.15232059191162016
Horse25	rSRL	straight_sitting_sound_limb	4.3203	-4.3203	1.29206874546148016
Horse25	rSRR	straight_sitting_lame_limb	0.8941	-0.8941	1.8123661968804
Horse25	rSS	rSS	3.8882	-3.8882	1.78257281485219008
Horse25	rSH	rSH	3.1206	-3.1206	1.78808279826920992
Horse23	rCrRL	circle_outside_sitting_sound_limb	3.1768	-3.1768	2.01323609276481024
Horse23	rCrRR	circle_outside_sitting_lame_limb	-0.6578	0.6578	2.67712099440720992
Horse23	rCrH	circle_outside_hunt	0.9746	-0.9746	1.83941384700713984
Horse23	rCrS	circle_outside_sitting	0.5849	-0.5849	2.56987901340856864
Horse23	rClRR	circle_inside_sitting_lame_limb	9.4089	-9.4089	2.83470906236702016
Horse23	rClRL	circle_inside_sitting_sound_limb	9.8898	-9.8898	2.41187422870275008
Horse23	rClS	circle_inside_sitting	10.2809	-10.2809	3.05552681989952
Horse23	rClH	circle_inside_hunt	9.6737	-9.6737	1.84129977646263008
Horse23	rSRR	straight_sitting_lame_limb	4.7731	-4.7731	2.61009798519015008
Horse23	rSRL	straight_sitting_sound_limb	6.7518	-6.7518	2.27325830105103008
Horse23	rSS	rSS	5.1564	-5.1564	3.18658953165648
Horse23	rSH	rSH	5.4200	-5.4200	2.32393565846584
Horse23	uCr	unridden_lame_outside	1.3514	-1.3514	1.78194022480937024
Horse23	uCl	unridden_lame_inside	8.7950	-8.7950	2.39282811024843008
Horse23	uS	uS	4.2748	-4.2748	3.25812282019489024

## Sheet: PDmax_asymmetric
Horse	Condition1	Condition3	Hind_Diff_Max_Mean3	Hind_Diff_Max_Mean1	Hind_Diff_Max_SD
Horse5	rCrH	circle_outside_hunt	3.6526	-3.6526	1.91317672996364
Horse5	rCrRL	circle_outside_sitting_sound_limb	-4.1976	4.1976	2.49317532512946016
Horse5	rCrRR	circle_outside_sitting_lame_limb	4.4271	-4.4271	2.29377692684861984
Horse5	rClH	circle_inside_hunt	-1.4799	1.4799	2.93505756390897024
Horse5	rClRR	circle_inside_sitting_lame_limb	4.1661	-4.1661	2.17813468278380032
Horse5	rClRL	circle_inside_sitting_sound_limb	-5.9352	5.9352	2.45291642521697984
Horse5	rSRR	straight_sitting_lame_limb	4.7296	-4.7296	1.74149435983042016
Horse5	rSRL	straight_sitting_sound_limb	-1.2305	1.2305	2.03344486387824
Horse5	rSS	rSS	2.5374	-2.5374	2.00366999384144992
Horse5	rSH	rSH	2.4997	-2.4997	3.61142419438292992
Horse5	uCr	unridden_lame_outside	1.7348	-1.7348	2.41606242027418976
Horse5	uCl	unridden_lame_inside	0.1201	-0.1201	2.94534459306052032
Horse5	uS	uS	3.5638	-3.5638	2.96679217795123008
Horse8	uCr	unridden_lame_inside	1.4891	1.4891	1.8344535779118
Horse8	uCl	unridden_lame_outside	4.9211	4.9211	2.26094308821250016
Horse8	rSH	rSH	1.1465	1.1465	2.26996073429118016
Horse8	rSS	rSS	2.9085	2.9085	2.21550394152346976
Horse8	rSRR	straight_sitting_sound_limb	-0.0906	-0.0906	2.01530355887256992
Horse8	rSRL	straight_sitting_lame_limb	5.9854	5.9854	1.76945018604448
Horse8	rCrS	circle_inside_sitting	1.7919	1.7919	2.11301020931349984
Horse8	rCrH	circle_inside_hunt	-1.4457	-1.4457	2.12841968938671008
Horse8	rCrRL	circle_inside_sitting_lame_limb	3.4675	3.4675	2.25915854065274016
Horse8	rCrRR	circle_inside_sitting_sound_limb	-3.0272	-3.0272	2.37864815805592
Horse8	rClH	circle_outside_hunt	4.4785	4.4785	1.96230255180227008
Horse8	rClS	circle_outside_sitting	5.0920	5.0920	1.53740544241052992
Horse8	rClRR	circle_outside_sitting_sound_limb	1.0571	1.0571	1.62288582340715008
Horse8	rClRL	circle_outside_sitting_lame_limb	6.5615	6.5615	2.22286223886337984
Horse8	uS	uS	4.5361	4.5361	1.67757570307272992
Horse13	uS	uS	4.9918	-4.9918	3.05189577323533952
Horse13	uCr	unridden_lame_outside	-0.1519	0.1519	1.71672250101083008
Horse13	uCl	unridden_lame_inside	1.8097	-1.8097	2.43468994005799008
Horse13	rSRR	straight_sitting_lame_limb	1.8016	-1.8016	1.19536694762948
Horse13	rSRL	straight_sitting_sound_limb	1.0744	-1.0744	1.3952801632987224
Horse13	rSH	rSH	1.0698	-1.0698	3.10907641466788992
Horse13	rSS	rSS	1.3412	-1.3412	2.37006226697489024
Horse13	rCrRL	circle_outside_sitting_sound_limb	-0.8560	0.8560	2.33979764103925984
Horse13	rCrRR	circle_outside_sitting_lame_limb	-0.6718	0.6718	2.38818365104612992
Horse13	rCrS	circle_outside_sitting	-0.7269	0.7269	1.99410888350830016
Horse13	rCrH	circle_outside_hunt	0.2719	-0.2719	2.12842849967056992
Horse13	rClRR	circle_inside_sitting_lame_limb	2.3127	-2.3127	1.92274044579283008
Horse13	rClRL	circle_inside_sitting_sound_limb	1.2548	-1.2548	2.37894518953654976
Horse13	rClH	circle_inside_hunt	1.9884	-1.9884	2.93620645762212992
Horse13	rClS	circle_inside_sitting	1.3486	-1.3486	2.98979792561090048
Horse14	rCrS	circle_outside_sitting	4.1241	-4.1241	2.44628470838462016
Horse14	rCrH	circle_outside_hunt	6.1236	-6.1236	2.72440403035382016
Horse14	rCrRL	circle_outside_sitting_sound_limb	2.5282	-2.5282	1.94525867600444992
Horse14	rCrRR	circle_outside_sitting_lame_limb	6.5465	-6.5465	1.93195138605528992
Horse14	rClS	circle_inside_sitting	0.8454	-0.8454	2.79883700017962016
Horse14	rClH	circle_inside_hunt	1.2159	-1.2159	2.82702826869022016
Horse14	rClRR	circle_inside_sitting_lame_limb	4.8590	-4.8590	1.57081474813451008
Horse14	rClRL	circle_inside_sitting_sound_limb	0.2563	-0.2563	2.12268789693135008
Horse14	rSS	rSS	3.6751	-3.6751	2.08613927645756
Horse14	rSH	rSH	6.5257	-6.5257	1.90376973247135008
Horse14	rSRR	straight_sitting_lame_limb	7.4745	-7.4745	1.65384712072171008
Horse14	rSRL	straight_sitting_sound_limb	2.8985	-2.8985	1.92132270151428
Horse14	uCr	unridden_lame_outside	4.5834	-4.5834	2.48899048525996992
Horse14	uCl	unridden_lame_inside	1.9238	-1.9238	1.58943729199104
Horse14	uS	uS	3.5809	-3.5809	2.91510159187278016
Horse15	uCr	unridden_lame_outside	7.3006	-7.3006	3.26794316655123008
Horse15	uS	uS	3.9313	-3.9313	2.59708114549428
Horse15	rClS	circle_inside_sitting	-0.0558	0.0558	4.21781237306729024
Horse15	rClH	circle_inside_hunt	2.7334	-2.7334	3.22378367678550016
Horse15	rClRR	circle_inside_sitting_lame_limb	5.9970	-5.9970	2.85427842449239008
Horse15	rClRL	circle_inside_sitting_sound_limb	4.3659	-4.3659	3.23822723708027008
Horse15	rCrH	circle_outside_hunt	11.0582	-11.0582	3.55344619557163968
Horse15	rCrS	circle_outside_sitting	10.6633	-10.6633	3.65419342577459968
Horse15	rCrRL	circle_outside_sitting_sound_limb	5.5702	-5.5702	4.08049194166661952
Horse15	rCrRR	circle_outside_sitting_lame_limb	7.9921	-7.9921	3.10715241196529984
Horse15	rSS	rSS	7.5471	-7.5471	2.45014538970011008
Horse15	rSH	rSH	5.8361	-5.8361	2.39506415771899008
Horse15	rSRR	straight_sitting_lame_limb	10.9431	-10.9431	2.45058258680447008
Horse15	rSRL	straight_sitting_sound_limb	5.3104	-5.3104	2.22205769243335008
Horse15	uCl	unridden_lame_inside	0.3339	-0.3339	3.49016985023339968
Horse16	rSS	rSS	1.7310	1.7310	2.28106750499220992
Horse16	rSRR	straight_sitting_sound_limb	0.6686	0.6686	2.11415278695544992
Horse16	rSRL	straight_sitting_lame_limb	6.0326	6.0326	1.38288820453547008
Horse16	rSH	rSH	3.9212	3.9212	2.52398599008993984
Horse16	rClH	circle_outside_hunt	4.6020	4.6020	3.04991481970052992
Horse16	rClRR	circle_outside_sitting_sound_limb	-0.3615	-0.3615	1.90576500795912992
Horse16	rClRL	circle_outside_sitting_lame_limb	7.8978	7.8978	2.44487419879108992
Horse16	rClS	circle_outside_sitting	1.9849	1.9849	2.06359715972405984
Horse16	rCrH	circle_inside_hunt	4.7405	4.7405	2.90804521456273984
Horse16	rCrRL	circle_inside_sitting_lame_limb	6.0889	6.0889	1.72446833866660992
Horse16	rCrRR	circle_inside_sitting_sound_limb	0.8504	0.8504	1.66834022458077984
Horse16	rCrS	circle_inside_sitting	4.0248	4.0248	2.07598459316192
Horse16	uS	uS	4.6944	4.6944	2.34505038077677024
Horse16	uCl	unridden_lame_outside	3.8197	3.8197	2.97382691832464
Horse16	uCr	unridden_lame_inside	4.4569	4.4569	1.82687882649849024
Horse20	uS	uS	9.0297	9.0297	4.10321109409712
Horse20	uCr	unridden_lame_inside	3.1950	3.1950	2.61848028525561024
Horse20	uCl	unridden_lame_outside	5.3616	5.3616	2.76949487340712
Horse20	rSH	rSH	2.6206	2.6206	3.20435935867969984
Horse20	rSS	rSS	7.5723	7.5723	3.18355433141148992
Horse20	rSRR	straight_sitting_sound_limb	2.6663	2.6663	2.41550238771508
Horse20	rSRL	straight_sitting_lame_limb	12.6149	12.6149	2.50825636072285984
Horse20	rCrH	circle_inside_hunt	1.7150	1.7150	3.57066002734084992
Horse20	rCrS	circle_inside_sitting	7.0893	7.0893	3.10819967585219968
Horse20	rCrRL	circle_inside_sitting_lame_limb	12.5011	12.5011	2.72728001924195008
Horse20	rCrRR	circle_inside_sitting_sound_limb	-0.5602	-0.5602	2.68520200580213024
Horse20	rClH	circle_outside_hunt	8.0350	8.0350	2.66443654639618016
Horse20	rClS	circle_outside_sitting	7.8563	7.8563	2.578020936409
Horse20	rClRR	circle_outside_sitting_sound_limb	3.1581	3.1581	3.01974343947772032
Horse20	rClRL	circle_outside_sitting_lame_limb	16.1314	16.1314	2.94402866641128
Horse25	uCl	unridden_lame_inside	1.9028	-1.9028	1.81892701894291008
Horse25	uCr	unridden_lame_outside	2.0001	-2.0001	2.34713064014241024
Horse25	uS	uS	3.0232	-3.0232	2.50512702050984
Horse25	rClRR	circle_inside_sitting_lame_limb	8.9609	-8.9609	2.34781902607560992
Horse25	rClRL	circle_inside_sitting_sound_limb	2.7408	-2.7408	1.99012533592780992
Horse25	rClS	circle_inside_sitting	6.6184	-6.6184	2.37677654973784992
Horse25	rClH	circle_inside_hunt	2.8572	-2.8572	2.45829548448824
Horse25	rCrRL	circle_outside_sitting_sound_limb	1.0096	-1.0096	2.79363372908002016
Horse25	rCrRR	circle_outside_sitting_lame_limb	7.9798	-7.9798	2.18430754653372
Horse25	rCrS	circle_outside_sitting	5.7211	-5.7211	2.67243606358522016
Horse25	rCrH	circle_outside_hunt	4.8372	-4.8372	2.68384595622005984
Horse25	rSRL	straight_sitting_sound_limb	1.3804	-1.3804	1.71486865983600992
Horse25	rSRR	straight_sitting_lame_limb	7.0543	-7.0543	1.55772972140279008
Horse25	rSS	rSS	4.4380	-4.4380	2.10863739804428
Horse25	rSH	rSH	2.2450	-2.2450	2.06994713048286016
